# Supplementary material for: Psychological distress following a motor vehicle crash: evidence from a statewide retrospective study examining settlement times and costs of compensation claims
Source: PubMed Central journal article supplement — BMJ Open. 2017 Sep 5;7(9):e017515. doi: 10.1136/bmjopen-2017-017515 (PMC5588945; doi:10.1136/bmjopen-2017-017515), 2017-09-05
Supplement: bmjopen-2017-017515.draft_revisions.pdf [file bmjopen-2017-017515.draft_revisions.pdf]

# BMJ Open

BMJ Open is committed to open peer review. As part of this commitment we make the peer review history of every article we publish publicly available.

When an article is published we post the peer reviewers' comments and the authors' responses online. We also post the versions of the paper that were used during peer review. These are the versions that the peer review comments apply to.

The versions of the paper that follow are the versions that were submitted during the peer review process. They are not the versions of record or the final published versions. They should not be cited or distributed as the published version of this manuscript.

BMJ Open is an open access journal and the full, final, typeset and author-corrected version of record of the manuscript is available on our site with no access controls, subscription charges or pay-per-view fees (<http://bmjopen.bmj.com>).

If you have any questions on BMJ Open's open peer review process please email [editorial.bmjopen@bmj.com](mailto:editorial.bmjopen@bmj.com)

# BMJ Open

## Psychological distress following a motor vehicle crash: compelling evidence from a state-wide retrospective study examining settlement times and costs of compensation claims

|                                    |                                                                                                                                                                                                                                                                  |
|------------------------------------|------------------------------------------------------------------------------------------------------------------------------------------------------------------------------------------------------------------------------------------------------------------|
| Journal:                           | <i>BMJ Open</i>                                                                                                                                                                                                                                                  |
| Manuscript ID                      | bmjopen-2017-017515                                                                                                                                                                                                                                              |
| Article Type:                      | Research                                                                                                                                                                                                                                                         |
| Date Submitted by the Author:      | 27-Apr-2017                                                                                                                                                                                                                                                      |
| Complete List of Authors:          | Guest, Rebecca; University of Sydney,<br>Tran, Yvonne<br>Gopinath, Bamini; University of Sydney, Centre for Vision Research<br>Cameron, Ian; University of Sydney, Rehabilitation Studies Unit<br>Craig, Ashley; University of Sydney, Northern Clinical School; |
| <b>Primary Subject<br>Heading</b>: | Rehabilitation medicine                                                                                                                                                                                                                                          |
| Secondary Subject Heading:         | Mental health, Rehabilitation medicine                                                                                                                                                                                                                           |
| Keywords:                          | motor vehicle crash, psychological distress, musculoskeletal injury,<br>compensation, post traumatic stress disorder                                                                                                                                             |
|                                    |                                                                                                                                                                                                                                                                  |

SCHOLARONE™  
Manuscripts

1  
2  
3 Psychological distress following a motor vehicle crash: compelling evidence from a state-  
4 wide retrospective study examining settlement times and costs of compensation claims  
5  
6  
7  
8  
9  
10  
11  
12  
13

14 Rebecca Guest<sup>a</sup>, Yvonne Tran<sup>a</sup>, Bamini Gopinath<sup>a</sup>, Ian D Cameron<sup>a</sup>, Ashley Craig<sup>a</sup>  
15  
16  
17  
18  
19  
20  
21  
22

23 <sup>a</sup>John Walsh Centre for Rehabilitation Research, Kolling Institute for Medical Research,  
24 Sydney Medical School-Northern, The University of Sydney  
25  
26  
27  
28

29 Correspondence to: Rebecca Guest, John Walsh Centre for Rehabilitation Research, Kolling  
30 Institute for Medical Research, Sydney Medical School-Northern, The University of Sydney  
31 Corner Reserve Road and First Avenue, Royal North Shore Hospital, St Leonards, NSW  
32 2065, Australia; email: rebecca.guest@sydney.edu.au; telephone: +61 2 99264962; fax: 61 2  
33 99264045.  
34  
35  
36  
37  
38  
39  
40  
41  
42

43 **Key Words:** motor vehicle crash, psychological distress, musculoskeletal injury,  
44 compensation, post-traumatic stress disorder  
45  
46

47 **Word count 3868 Tables 3 Figures 0**  
48  
49  
50  
51  
52  
53  
54  
55  
56  
57  
58  
59  
60

## Abstract

**Objective:** To determine whether psychological distress associated with musculoskeletal injuries sustained in a motor vehicle crash (MVC), regardless of time of onset, impacts compensation outcomes such as claim settlement times and costs. Second, to identify factors routinely collected by insurance companies that contribute to psychological distress during the compensation process.

**Design:** State-wide retrospective study.

**Data Source:** Analysis of the New South Wales state-wide (Australia) injury register for MVC survivors who lodged a compensation claim from 2011 to 2013.

**Participants:** 6,341 adults who sustained a musculoskeletal injury, and who settled a claim for injury compensation after a MVC. Participants included those diagnosed with psychological distress (n=607) versus those not diagnosed (n=5,734).

**Main Outcome Measures:** Time to settlement and total costs of compensation claims, as well as socio-demographic and injury characteristics that may contribute to elevated psychological distress, such as socioeconomic disadvantage, prior claim history, and injury severity.

**Results:** Psychological distress in those with a musculoskeletal injury was associated with significantly longer settlement times (an additional 17 weeks) and considerably higher costs (an additional A\$41, 575.00, or 4.3 times more expensive). Multivariate logistic regression analysis identified risk factors for psychological distress including being female, social disadvantage, unemployment prior to the claim, not being at fault in the MVC, requiring ambulance transportation and rehabilitation as part of recovery.

**Conclusions:** Results provide compelling evidence that psychological distress has an adverse impact on people with musculoskeletal injury as they progress through compensation. Findings suggest additional resources should be directed toward claimants

1  
2  
3 who are at risk (e.g. the socially disadvantaged or those unemployed prior to the claim), the  
4  
5 aim being to reduce risk of psychological distress and subsequent risk of increased settlement  
6  
7 times and claim costs. Prospective studies are now required that investigate treatment  
8  
9 strategies for those at risk of psychological distress associated with a MVC.  
10  
11  
12  
13  
14  
15  
16  
17  
18  
19  
20  
21  
22  
23  
24  
25  
26  
27  
28  
29  
30  
31  
32  
33  
34  
35  
36  
37  
38  
39  
40  
41  
42  
43  
44  
45  
46  
47  
48  
49  
50  
51  
52  
53  
54  
55  
56  
57  
58  
59  
60

### Strengths and limitations of this study

- This is the first study to investigate the impact of psychological distress in all claimants experiencing a musculoskeletal injury and who lodge and settle their compensation claim for a MVC over a 2 year period in the state of NSW. It was revealed that the presence of psychological distress greatly increased settlement times and costs.
- The study identified risk factors associated with an increased likelihood of psychological distress after a MVC.
- The study has the potential to change medical practice and insurance policy for those at risk of psychological distress following a MVC.
- It was not possible to determine whether psychological distress was present prior to the MVC, as this information is not routinely collected by insurance companies.

## INTRODUCTION

Motor vehicle crashes (MVC) remain a major source of physical injury and distress. For example, in the UK there were 194,477 reported casualties in a traffic accident in 2014<sup>1</sup> while in Australia in 2013 the rate of annual hospitalised injuries associated with a MVC was 151.7 per 100,000.<sup>2</sup> Psychological distress associated with a MVC has been shown to be substantial and prevalent.<sup>3-7</sup> A recent meta-analysis investigated the extent of psychological distress associated with a MVC.<sup>3</sup> Regardless of whether the psychological distress occurred prior to or after the MVC, the study revealed that traumatic brain injury, spinal cord injury and musculoskeletal injury (i.e. whiplash) resulted in significantly elevated levels of distress<sup>3</sup> and psychological distress has been shown to remain elevated for at least 3 years post-MVC.<sup>3</sup><sup>8-10</sup> Recent prospective research found 1 in 2 persons suffered elevated rates of psychological distress (e.g. depression) soon after the MVC and many of these continue to experience elevated distress 12 months after the MVC.<sup>9</sup> Factors such as more severe physical injury, older age, and past negative emotional reactions to distress were associated with elevated psychological distress 12 months post-MVC.<sup>9</sup> For the purpose of this study, psychological distress is defined as an unpleasant mental condition perceived as disturbing and which can impede daily functioning, with mental symptoms including agitation, fatigue, confusion, loss of motivation and depressed mood.

Research suggests the compensation process following a MVC increases distress, for example, health outcomes of people who lodge injury-related compensation claims are more likely to have higher levels of distress than those who do not claim.<sup>11-17</sup> Furthermore, preliminary research suggests when a person has experienced a physical injury as well as psychological distress, the cost of their claim has been shown to double.<sup>18</sup> Other research has found poorer outcomes for claimants who were not at-fault compared to those at-fault.<sup>19</sup> The potential negative impact of psychological distress in the claims process is clearly undesirable

1  
2  
3 in terms of complicating medical treatment for the injured person, and challenging policy  
4 direction and effectiveness for insurers. A more desirable outcome is to minimise time spent  
5 in the compensation process, because this would likely reduce the negative impact on the  
6 individual's health, and contain claim costs for healthcare systems and insurers.<sup>20</sup>  
7  
8  
9  
10

11 Musculoskeletal injuries are common following a MVC and often lead to  
12 compensation claims<sup>21-23</sup> and the risk of developing psychological distress with this physical  
13 injury is high.<sup>3 24</sup> Musculoskeletal injuries typically involve soft tissue injuries to the lower  
14 back, shoulders, hips and knees as well as whiplash injuries, and account for more than  
15 65,000 injuries in Australia each year following a MVC, at a cost in excess of A\$950m.<sup>25</sup>  
16 Barriers to recovery from MVC-related musculoskeletal injuries include high initial pain  
17 intensity,<sup>26 27</sup> being female,<sup>20 28</sup> involvement in the compensation claims process<sup>14 20</sup> and  
18 elevated psychological distress.<sup>29 30</sup> Furthermore, recent research found significantly  
19 increased levels of psychological distress for MVC related whiplash-associated disorder  
20 (WAD) compared to controls.<sup>3 31</sup>  
21  
22  
23  
24  
25  
26  
27  
28  
29  
30  
31  
32  
33

34 A review of research that focussed on disability arising from a MVC concluded that  
35 there was a need to clarify rates of disability arising from a MVC, especially with regard to  
36 methodological issues and complicating factors like compensation.<sup>32</sup> This is also true for the  
37 impact of psychological distress following a MVC, including the influence of involvement in  
38 compensation claims.<sup>3 9</sup> Research in this area has been limited by uncertain diagnoses of  
39 psychological distress disorders and small sample sizes. In contrast, the research presented in  
40 this paper has addressed many of the limitations of prior research. For instance, it utilised a  
41 database of 6,341 persons with musculoskeletal injury from the state-wide injury register of  
42 the New South Wales (NSW) State Insurance Regulatory Authority (SIRA), the authority that  
43 administers the NSW Compulsory Third Party (CTP) scheme. This state-wide register also  
44 provides records with confirmed diagnoses of psychological distress, based on the  
45  
46  
47  
48  
49  
50  
51  
52  
53  
54  
55  
56  
57  
58  
59  
60



1  
2  
3 International Statistical Classification of Disease and Related Health Problems, Tenth  
4  
5 Revision, Australian Modification (ICD-10-AM),<sup>33</sup> regardless of when the psychological  
6  
7 distress was first diagnosed. The NSW CTP scheme is a fault based scheme with limited  
8  
9 access to entitlements for those at fault. Its purpose is to compensate those with injuries who  
10  
11 were not at fault in the MVC with the claim requiring police and medical reports as evidence,  
12  
13 in addition to a personal injury claim form.<sup>34</sup> An estimated 55% of all NSW MVC-related  
14  
15 injuries result in the lodgement of a CTP claim.<sup>35</sup>  
16  
17

18  
19 The objective of this research was to analyse the data of all NSW MVC survivors who  
20  
21 sustained a musculoskeletal injury and who settled their claim over a two year period.  
22  
23 Compensation outcomes of those without diagnosed psychological distress were then  
24  
25 compared to those with diagnosed psychological distress. Specifically, the aim was to  
26  
27 determine the impact of psychological distress, regardless of time of onset, on claim  
28  
29 settlement times and total costs.<sup>34</sup> A further aim was to determine factors, routinely collected  
30  
31 by NSW CTP insurance companies and collated by SIRA, that predict elevated risk of having  
32  
33 psychological distress. Accordingly, findings should address 2 key research questions: 1.  
34  
35 whether psychological distress is associated with longer claim time to completion and greater  
36  
37 claim costs, and 2. what injury or demographic characteristics are associated with  
38  
39 psychological distress. The findings should be beneficial for informing general practitioners  
40  
41 and insurer policymakers, and thus improve healthcare practices for injury-related  
42  
43 compensation claimants.  
44  
45  
46  
47  
48

## 49 **METHOD**

### 50 **Participants**

51  
52 Permission was sought and granted on 22<sup>nd</sup> November 2016 from SIRA to access a total of  
53  
54 24,164 claims from the Personal Injury Register (PIR) of SIRA to determine their potential  
55  
56  
57  
58  
59  
60

1  
2  
3 inclusion in the analysis. The PIR contains all MVC-related claims that occur in NSW.  
4  
5 Inclusion criteria consisted of i) the injured adult (18+) having a musculoskeletal injury and  
6  
7 ii) the claim had been lodged and also settled over a 27 month period (October, 2011-  
8  
9 December, 2013). Claims which had been lodged but not settled, and claims involving  
10  
11 catastrophic injuries such as spinal cord injury and severe traumatic brain injury were  
12  
13 excluded (catastrophic injury related claims are directed toward an alternative scheme in  
14  
15 NSW). This resulted in 6,341 participants who had experienced a MVC and sustained a  
16  
17 musculoskeletal injury, and who lodged and settled a claim in NSW, Australia between  
18  
19 October 2011 and December 2013 (27 months). The combined cohort data was received from  
20  
21 SIRA in de-identified form and therefore human research ethics approval was deemed not to  
22  
23 be required.  
24  
25  
26  
27  
28

### 29 **Measurements**

30  
31 Musculoskeletal injury severity was assessed using the New Injury Severity Score (NISS)  
32  
33 which computes the simple sum of squares of the three most severe injuries identified by the  
34  
35 abbreviated injury scale (AIS).<sup>36</sup> The Index of Relative Socioeconomic Disadvantage (IRSD)  
36  
37 was calculated from the Socio Economic Index for Areas (SEIFA) which ranks areas in  
38  
39 Australia according to relative socio-economic advantage and disadvantage.<sup>37</sup> Rehabilitation  
40  
41 Indicator refers to whether the claimant required rehabilitation as part of their recovery plan.  
42  
43 Presence of psychological distress, such as post-traumatic stress disorder or major depressive  
44  
45 disorders, was determined using the ICD-10-AM Classification of Mental and Behavioural  
46  
47 Disorders: Clinical Descriptions and Diagnostic Guidelines<sup>38</sup> at some time within the claims  
48  
49 process (the database is progressively updated over the duration of the claim). Psychological  
50  
51 distress was determined from sources such as reports and independent assessments from  
52  
53 General Practitioners, Psychiatrists, and Psychologists. It is recognised that psychological  
54  
55  
56  
57  
58  
59  
60

1  
2  
3 distress could be present prior to the claimant's MVC, and that this has the potential to  
4 influence psychological distress post-MVC.<sup>3</sup> However, timing of onset of psychological  
5 distress was not the aim of this research given such information is not routinely collected by  
6 NSW insurance companies and is therefore not collated by the NSW regulatory authority. Of  
7 the 6,341, those with musculoskeletal injury without psychological distress numbered 5,374  
8 (90.4%) and those with both musculoskeletal injury and psychological distress numbered 607  
9 (9.6%).

### 19 **Statistical analysis**

20  
21  
22 A retrospective design was employed to analyse the PIR datasets of all NSW MVC survivors  
23 at the time of their claim lodgement (both minor claims, that is, 'Accident Notifications  
24 Forms' and full claims) over 27 months, and who met the inclusion criteria. Reporting was  
25 guided by the relevant checklist (see STROBE Statement in supplemental file 1). Descriptive  
26 statistics were used to summarise demographic and claim/accident characteristics of the  
27 participants by psychological distress status. The differences in the demographics and claim  
28 characteristics between those that claimed compensation and those that did not were  
29 compared using analysis of variance (ANOVA) tests for continuous variables and chi-square  
30 tests for categorical variables. In order to determine predictive factors, logistic regression was  
31 employed. Only statistically significant socio-demographic and injury variables from Table 1  
32 were included in the logistic regression analysis from which unadjusted odds ratios were  
33 determined. Following this, all the variables were again used in backward elimination ( $P < .05$ )  
34 logistic regression, and adjusted odds ratios calculated.

35  
36  
37  
38  
39  
40  
41  
42  
43  
44  
45  
46  
47  
48  
49  
50  
51  
52  
53  
54  
55  
56  
57  
58  
59  
60  
Logistic regression can provide information on factors that are associated with having  
psychological distress and advantages of employing this statistical methodology include its  
ability for isolating predictors, and for producing odds ratios.<sup>39</sup> Whilst Table 1 showed there

was a significantly higher probability ( $P < .01$ ) for those who had psychological distress also having legal representation (61.0%) compared to musculoskeletal injury only claimants (18.9%), this injury characteristic was excluded from the logistic regression as legal representation can be instigated not only at the time of the claim lodgement, but at any time throughout the claims process, thus making it difficult to establish its predictive association with psychological distress. Again, it should be noted that psychological distress can develop before the injury, as well as at any time throughout the claims process.

All variables selected for the logistic regression have been investigated in prior studies for their relevance to injury outcomes following MVC.<sup>11 40</sup> To determine the predictive capacity of the logistic regression model, ROC estimates were calculated. The ROC plots the true-positive rate (sensitivity) against the false-positive rate ( $1 - \text{specificity}$ ) in detecting factors that influence greater time to claim settlement and elevated costs for MVC claimants with musculoskeletal injuries with and without psychological distress.

## RESULTS

Socio-demographic and injury characteristics are shown in Table 1. All factors shown in Table 1 were either pre-injury factors or assessed at the time of lodging the claim, except for legal representation which can potentially occur at any time during the claims process. Mean days from MVC to lodgement of a minor 'no fault' claim (Accident Notification Form) was 23 days ( $SD=22.8$ ) and to full claim lodgement was 110 days ( $SD=84.0$ ).

Table 1 Socio-demographic and injury characteristics of NSW MVC claimants 2011-2013

| Variable                          | Musculoskeletal Injury<br>( <i>n</i> =5734) | Musculoskeletal Injury + Psych Distress<br>( <i>n</i> =607) | P    |
|-----------------------------------|---------------------------------------------|-------------------------------------------------------------|------|
| Age (years), Mean (SD)            | 42.8 (16.3)                                 | 44.4 (15.9)                                                 | 0.02 |
| New Injury Severity Score, No (%) |                                             |                                                             | 0.02 |

|    |                                                                |                    |                |       |
|----|----------------------------------------------------------------|--------------------|----------------|-------|
| 1  |                                                                |                    |                |       |
| 2  |                                                                |                    |                |       |
| 3  | Minor- moderate 1-8                                            | 5259 (91.9)        | 539 (88.8)     |       |
| 4  | Serious 9-15                                                   | 348 (6.1)          | 54 (8.9)       |       |
| 5  | Severe- critical 16-75                                         | 114 (2.0)          | 14 (2.3)       |       |
| 6  | <b>Index of Relative Socioeconomic Disadvantage, Mean (SD)</b> | 1017.0 (86.4)      | 986.5 (89.2)   | <0.01 |
| 7  | <b>Index of Relative Socioeconomic Disadvantage, No (%)</b>    |                    |                | <0.01 |
| 8  | Most disadvantaged                                             | 983 (17.4)         | 182 (30.3)     |       |
| 9  | Disadvantaged                                                  | 803 (14.2)         | 72 (12.5)      |       |
| 10 | Average                                                        | 1007 (17.8)        | 113 (18.8)     |       |
| 11 | Advantaged                                                     | 853 (15.1)         | 95 (15.8)      |       |
| 12 | Most advantaged                                                | 1996 (35.4)        | 136 (22.6)     |       |
| 13 | <b>Male, No (%)</b>                                            | 2417 (42.2)        | 212 (34.9)     | <0.01 |
| 14 | <b>Employment Status, No (%) (Yes)</b>                         | 4197 (73.2)        | 364 (60.0)     | <0.01 |
| 15 | <b>Occupation skill level, No (%)</b>                          |                    |                | <0.01 |
| 16 | Managers and Administrators                                    | 567 (9.9)          | 34 (5.6)       |       |
| 17 | Professionals                                                  | 1026 (17.9)        | 34 (5.6)       |       |
| 18 | Para-professionals                                             | 213 (3.7)          | 74 (12.2)      |       |
| 19 | Tradespersons                                                  | 257 (4.5)          | 17 (12.2)      |       |
| 20 | Clerks                                                         | 600 (10.5)         | 26 (4.3)       |       |
| 21 | Sales persons and Personal Service workers                     | 680 (11.9)         | 63 (10.4)      |       |
| 22 | Plant and Machine Operators and Drivers                        | 225 (3.9)          | 64 (10.5)      |       |
| 23 | Labourers and related workers                                  | 537 (9.4)          | 22 (3.6)       |       |
| 24 | <b>At Fault* (No), No (%)</b>                                  | 4866 (87.9)        | 568 (96.1)     | <0.01 |
| 25 | <b>Prior Claim (Yes), No (%)</b>                               | 620 (10.8)         | 86 (14.2)      | 0.012 |
| 26 | <b>Economic Loss Claim (No), No (%)</b>                        | 3101 (54.1)        | 329 (54.2)     | 0.96  |
| 27 | <b>Weekly Earnings, Mean (SD)</b>                              | 1212.4<br>(2832.6) | 1001.4 (659.4) | 0.23  |
| 28 | <b>Legal Representation, (Yes), No (%)</b>                     | 1085 (18.9)        | 370 (61.0)     | <0.01 |
| 29 | <b>Accident Notification (Days), Mean (SD)</b>                 | 22.6 (22.9)        | 23.9 (21.4)    | 0.32  |
| 30 | <b>Notification of Claim (Days), Mean (SD)</b>                 | 112.7 (86.7)       | 97.5 (69.1)    | <0.01 |
| 31 | <b>Rehabilitation Indicator, No (%)</b>                        |                    |                | <0.01 |
| 32 | Required                                                       | 398 (6.9)          | 127 (20.9)     |       |
| 33 | Possibly Required                                              | 2920 (50.9)        | 287 (47.3)     |       |
| 34 | Not Required                                                   | 1844 (32.2)        | 171 (28.2)     |       |
| 35 | <b>Role</b>                                                    |                    |                | <0.01 |
| 36 | Driver                                                         | 3764 (65.6)        | 386 (63.6)     |       |
| 37 | Passenger                                                      | 1120 (19.5)        | 156 (25.7)     |       |
| 38 | Rider                                                          | 404 (7.0)          | 23 (3.8)       |       |
| 39 | Pillion                                                        | 22 (0.4)           | 2 (0.3)        |       |
| 40 | Pedestrian                                                     | 237 (4.1)          | 30 (4.9)       |       |
| 41 | Cyclist                                                        | 159 (2.8)          | 7 (1.2)        |       |
| 42 | Other                                                          | 28 (0.5)           | 3 (0.5)        |       |
| 43 | <b>Ambulance (yes)</b>                                         | 2179 (38.0)        | 300 (49.4)     | <0.01 |
| 44 | <b>Hospital (yes)</b>                                          | 1405 (24.5)        | 173 (28.5)     | <0.01 |

**Note.** For some variables there were missing values; total number will therefore not always equal 6,341.

\* At fault claims are minor claims that are capped at payment of A\$5,000.00.

Table 2 shows a breakdown of musculoskeletal injury types for the sample separated by musculoskeletal injury only compared to musculoskeletal injury + psychological distress.

Whilst it is accepted that a MVC survivor is vulnerable to sustaining several different categories of injuries (for example, whiplash and lumbar and other soft tissue injuries), Table 2 shows the most common musculoskeletal injury was soft tissue, followed by whiplash injuries.

Table 2 Breakdown of musculoskeletal injury types by musculoskeletal injury versus musculoskeletal injury with psychological distress from 2011- 2013.

| Musculoskeletal Injury Type | Musculoskeletal Injury Only (%) | Musculoskeletal Injury + Psychological Distress (%) | Total |
|-----------------------------|---------------------------------|-----------------------------------------------------|-------|
| Soft Tissue                 | 4630 (89.78)                    | 527 (10.21)                                         | 5157  |
| Whiplash                    | 3746 (89.44)                    | 442 (10.55)                                         | 4188  |
| Skin                        | 2133 (86.81)                    | 324 (13.18)                                         | 2457  |
| Lumbar                      | 1256 (84.69)                    | 227 (15.30)                                         | 1483  |
| Chest                       | 985 (86.10)                     | 159 (13.89)                                         | 1144  |
| Seatbelt                    | 672 (84.31)                     | 125 (15.68)                                         | 797   |
| Thoracic                    | 634 (86.84)                     | 96 (13.15)                                          | 730   |
| Upper Limb Joint            | 441 (87.67)                     | 62 (12.32)                                          | 503   |
| Upper Limb Fracture         | 432 (93.50)                     | 30 (6.49)                                           | 462   |
| Lower Limb Fracture         | 413 (93.43)                     | 29 (6.56)                                           | 442   |
| Lower Limb Joint            | 229 (87.40)                     | 33 (12.59)                                          | 262   |
| Face                        | 82 (85.41)                      | 14 (14.58)                                          | 96    |
| Abdomen                     | 49 (90.74)                      | 5 (9.25)                                            | 54    |
| Neck                        | 4 (80.00)                       | 1 (20.00)                                           | 5     |
| Spinal Contusion            | 2 (100.00)                      | 0 (0.00)                                            | 2     |
| Finger Amputation           | 2 (100.00)                      | 0 (0.00)                                            | 2     |

### Claim settlement times, costs and legal representation

ANOVA results confirmed a significant difference between musculoskeletal injury and musculoskeletal injury + psychological distress claim settlement times ( $F=392.82$ ,  $df=1$ , 6339,  $P<.001$ ). Mean days to claim settlement from accident date was significantly longer for musculoskeletal injury + psychological distress compared to musculoskeletal injury only (353.81 days;  $SD=164.83$ ; 95% CI 340.67-366.95 versus 231.65 days;  $SD=142.08$ ; 95% CI

227.97-235.32 respectively). This difference was significantly longer for musculoskeletal injury + psychological distress claimants (mean difference 122.16 days or 17.45 weeks).

ANOVA results also confirmed a significant difference in claim costs between musculoskeletal injury and musculoskeletal injury+ psychological distress claimants ( $F=444.03$ ,  $df=1$ , 6339,  $P<.001$ ). Mean claim costs for musculoskeletal injury only claimants was \$12,421.13;  $SD=37,071.78$ ; 95% CI 11,461.39-13,380.87. Mean claim costs for musculoskeletal injury + psychological distress claimants was A\$53,996.52;  $SD=96,693.42$ ; 95%CI 46,288.92-61,704.11. This is an overall mean increase of A\$41,575.39 or 4.3 times more expensive per case. To understand better the effect of injury severity on claim costs, a further ANOVA was conducted with serious and above musculoskeletal injury removed. This did not change the findings. Mean cost for musculoskeletal injury was A\$10,034.54 ( $SD=28,378.90$ ; 95%CI 9,267.37-10,801.71). Mean cost of musculoskeletal injury + psychological distress was A\$43,262.87 ( $SD=61,927.97$ ; 95% CI 38,023.02-48,502.71, and this was significantly greater for the musculoskeletal injury + psychological distress group ( $F=516.71$ ,  $df=1$ , 6,607,  $P=.000$ ). Musculoskeletal injury + psychological distress claimants were also significantly more likely ( $P<.01$ ) to involve legal representation (61.0% compared to 18.9%).

### **Impact of socio-demographic and injury characteristics on probability of psychological distress**

Table 1 presents the factors at the time of the MVC and claim lodgement that either increase or decrease the probabilities of musculoskeletal injury claimants being diagnosed with psychological distress. Age, economic loss (defined as yes/no) associated with the injury and claim, weekly earnings and hospitalisation did not significantly increase the probability of psychological distress. Socioeconomic disadvantage increased the probability of experiencing

1  
2  
3 psychological distress (Mean musculoskeletal injury 1,017.9, SD=86.4; Mean  
4  
5 musculoskeletal injury + psychological distress 986.5, SD=89.2,  $P<.01$ ). For example, over  
6  
7 40% of those with psychological distress were socially disadvantaged compared to 31% of  
8  
9 those without psychological distress. There was a significant difference ( $P<.01$ ) between  
10  
11 male and female claimants in terms of probability of also having psychological distress, that  
12  
13 is, 65.1% were female who had a musculoskeletal injury + psychological distress compared  
14  
15 to 57.8% with only musculoskeletal injury. Claimants who were unemployed were more  
16  
17 likely to have psychological distress ( $P<.01$ ) compared to those employed. 4,197 (73.2%) of  
18  
19 those working at the time of lodging their claim did not have psychological distress compared  
20  
21 to 364 (60.0%) of those with musculoskeletal injury + psychological distress. 620 (10.8%) of  
22  
23 those with a history of a prior claim did not have psychological distress, whereas 86 (14.2%)  
24  
25 did have psychological distress suggesting those with a claim history are more likely to have  
26  
27 psychological distress in addition to their musculoskeletal injury ( $P=.01$ ). Those with a  
28  
29 musculoskeletal injury + psychological distress were more likely to have a serious injury  
30  
31 severity score ( $P=.02$ ). Those with a musculoskeletal injury + psychological distress were  
32  
33 also more likely to be not at fault (96.1% compared to 87.9% for musculoskeletal injury  
34  
35 only). It is noted here, however, that data taken from an 'at fault' scheme necessarily means  
36  
37 there are limited at-fault claimants reducing confidence in its association with psychological  
38  
39 distress. No significant difference was found between the two groups in terms of number of  
40  
41 days taken for notifying the insurer of the MVC (either via a minor claim, that is, Accident  
42  
43 Notification Form, or a full claim). However in terms of days taken to notify the insurer of  
44  
45 the claim lodgement, those who had psychological distress were more likely to notify  
46  
47 lodgement of their claim sooner ( $P<.01$ ). It was also more likely that the claimant will require  
48  
49 rehabilitation if they have psychological distress ( $P<.01$ ). A larger portion of passengers had  
50  
51 psychological distress, whereas motorbike riders and cyclists were less likely to have  
52  
53  
54  
55  
56  
57  
58  
59  
60



psychological distress ( $P<.01$ ). If an ambulance was required at the time of the MVC, the claimant was significantly more likely to have psychological distress in addition to their musculoskeletal injury ( $P<.01$ ), and similarly, if the claimant attended hospital they were more likely to have psychological distress ( $P<.01$ ) than if hospitalisation was not required.

### Logistic regression analysis of significant socio-demographic and injury characteristics

All socio-demographic and injury characteristics that were found to significantly differentiate between the two groups were entered into a logistic regression to determine their unadjusted and adjusted predictive power of psychological distress. Table 3 shows that six variables were associated with the presence of psychological distress. Being unemployed, being female, being socio-economically disadvantaged, not being at fault, requiring an ambulance at the time of their MVC and needing rehabilitation, were all found to be significant contributors to an increased risk of having psychological distress. The area under the ROC curve for this group of six variables was 70%. Adding non-significant variables to the logistic regression did not significantly add to this percentage, providing validity for the predictive capacity of the model.

Table 3 Logistic regression results showing predictors for claimants who experience psychological distress.

| Variable                                            | Unadjusted OR<br>(95% CI) | P      | Adjusted OR<br>(95% CI) | P      |
|-----------------------------------------------------|---------------------------|--------|-------------------------|--------|
| <b>Age</b>                                          | 1.01 (1.00, 1.01)         | 0.02   |                         |        |
| <b>New Injury Severity Score</b>                    |                           | 0.03   |                         |        |
| Minor- moderate 1-8                                 | 1.00                      |        |                         |        |
| Serious 9-15                                        | 1.51 (1.12, 2.04)         | 0.007  |                         |        |
| Severe– critical 16-75                              | 1.20 (0.68, 2.10)         | 0.53   |                         |        |
| <b>Index of Relative Socioeconomic Disadvantage</b> |                           | <0.001 |                         | <0.001 |
| Most disadvantaged                                  | 1.65 (1.28, 2.12)         | <0.001 | 1.55 (1.18, 20.6)       | 0.002  |
| Disadvantaged                                       | 0.83 (0.61, 1.13)         | 0.24   | 0.87 (0.62, 1.23)       | 0.43   |
| Average                                             | 1.00                      |        | 1.00                    |        |
| Advantaged                                          | 0.99 (0.74, 1.32)         | 0.96   | 1.07 (0.77, 1.48)       | 0.70   |
| Most advantaged                                     | 0.61 (0.47, 0.79)         | <0.001 | 0.60 (0.45, 0.81)       | 0.001  |

|                                          |                   |        |                   |        |
|------------------------------------------|-------------------|--------|-------------------|--------|
| <b>Male</b>                              | 0.73 (0.62, 0.87) | <0.001 | 0.72 (0.59, 0.88) | 0.001  |
| <b>Employment Status (Yes)</b>           | 0.55 (0.46, 0.65) | <0.001 | 0.71 (0.58, 0.87) | 0.001  |
| <b>At Fault (Yes)</b>                    | 0.29 (0.19, 0.45) | <0.001 | 0.25 (0.15, 0.40) | <0.001 |
| <b>Prior Claim (Yes)</b>                 | 1.36 (1.07, 1.73) | 0.013  |                   |        |
| <b>Rehabilitation Indicator</b>          |                   | <0.001 |                   | <0.001 |
| Required                                 | 1.00              |        | 1.00              |        |
| Possibly Required                        | 0.31 (0.24, 0.39) | <0.001 | 0.37 (0.29, 0.48) | <0.001 |
| Not Required                             | 0.29 (0.23, 0.38) | <0.001 | 0.36 (0.27, 0.48) | <0.001 |
| Other                                    | 0.12 (0.08, 0.19) | <0.001 | 0.17 (0.08, 0.38) | <0.001 |
| <b>Role</b>                              |                   | <0.001 |                   |        |
| Driver                                   | 1.00              |        |                   |        |
| Passenger                                | 1.36 (1.12, 1.66) | 0.002  |                   |        |
| Rider                                    | 0.56 (0.36, 0.86) | 0.008  |                   |        |
| Pillion                                  | 0.89 (0.21, 3.78) | 0.87   |                   |        |
| Pedestrian                               | 1.23 (0.83, 1.83) | 0.30   |                   |        |
| Cyclist                                  | 0.43 (0.32, 3.45) | 0.03   |                   |        |
| Other                                    | 1.05 (0.32, 3.45) | 0.94   |                   |        |
| <b>Transportation by Ambulance (yes)</b> | 1.47 (1.22, 1.77) | <0.001 | 1.44 (1.19, 1.76) | <0.001 |
| <b>Hospital (yes)</b>                    | 1.14 (0.94, 1.38) | 0.19   |                   |        |
|                                          | ROC=              | 0.70   |                   |        |

*Note.* Adjusted odds ratios (OR), 95% confidence intervals (95% CI). P-values are shown.

### Sensitivity analysis

Sensitivity analysis was conducted with a subset of those that had post-traumatic stress disorder (PTSD) only. In this subset those with other types of psychological distress were excluded from the analysis. For those with PTSD diagnosis only (n=83), SEIFA, fault and rehabilitation indicators were significant predictors. Although employment and sex were no longer significant in this model, the effect sizes for all predictors were greater in this PTSD only subset, indicating that no-significance is likely a result of reduced power in the sample. The overall performance of the model was greater in the PTSD only subset with a concordance index of 0.764 compared to 0.695 in the original model.

### DISCUSSION

In NSW, Australia a MVC fault based system is legislated which provides compensation for people injured in MVCs that were the fault of another vehicle owner or driver. The driver at

1  
2  
3 fault is the person who was driving the vehicle considered most at fault in the accident.<sup>35</sup>  
4  
5 Analysis of the PIR data of all NSW compensation claimants over 27 months between 2011  
6  
7 and 2013 who met the inclusion criteria revealed that almost 10% of claimants will be  
8  
9 diagnosed with elevated psychological distress such as depression or PTSD, or a distressing  
10  
11 condition involving significantly elevated anxiety and depressive mood. For comparison, the  
12  
13 Australian prevalence of elevated psychological distress such as PTSD is estimated at  
14  
15 0.9±0.1% and depression is estimated at 3.5±0.2%.<sup>41</sup> The prevalence of musculoskeletal  
16  
17 injury with a comorbid depression has been estimated at 29.51±3.21.<sup>42</sup> Furthermore, prior  
18  
19 research has consistently found levels of psychologically distressing symptomatology to  
20  
21 range between 20-40% for people sustaining injury in a MVC, irrespective of whether they  
22  
23 have made a compensation claim.<sup>3</sup> The current findings reported in this paper suggest a much  
24  
25 lower percentage of psychological symptomatology. Nevertheless, the psychological data  
26  
27 presented in this paper are reporting disorders rather than symptomatology. Distress  
28  
29 associated with the claims process has been documented,<sup>3</sup> and the significant escalations in  
30  
31 time to claim settlement and cost increases revealed in this study warrant action for their  
32  
33 amelioration. Prevalence differences found in prior studies may well be a factor of employing  
34  
35 prospective research designs and research- based diagnostic assessments. However, the  
36  
37 current findings have considerable consequences given they are based on outcomes from  
38  
39 every MVC casualty in NSW over a 27 month period with a defined injury (musculoskeletal)  
40  
41 and who settled their claim. Furthermore, the diagnosis of psychological distress was based  
42  
43 on international mental health criteria (ICD-10-AM) and sourced from treating clinicians and  
44  
45 independent medical/psychological assessments.  
46  
47  
48  
49  
50

51  
52 The findings also confirmed that the presence of psychological distress is associated  
53  
54 with substantially increased claim settlement times, a mean increase of the total cost of the  
55  
56 claim by over A\$40,000. Legal representation was also significantly more likely in those with  
57  
58  
59  
60

1  
2  
3 psychological distress. These findings provide compelling evidence, confirming that the  
4  
5 presence of psychological distress during the claims process (regardless of whether it was  
6  
7 pre-morbid or not), results in potentially adverse outcomes for the wellbeing of affected  
8  
9 individuals and for insurance and regulatory organisations with increased settlement times  
10  
11 and costs.

12  
13  
14 The identification of the factors that are likely to elevate risk of psychological distress  
15  
16 during the claims process for injury compensation following a MVC provide healthcare  
17  
18 professionals and insurance companies/regulatory bodies some scope for ameliorating the  
19  
20 risk of escalating claim settlement times and costs. The current study provided evidence for  
21  
22 six independent predictors of psychological distress during the claim process. It is not  
23  
24 surprising that unemployment, social disadvantage and a history of prior claims are risk  
25  
26 factors for increased psychological distress given they are somewhat related factors, and that  
27  
28 prior research has indicated their contribution to poorer mental health status.<sup>43 44</sup> It is  
29  
30 acknowledged that prior mental health problems can predispose people to elevated  
31  
32 psychological distress after their MVC,<sup>3 9</sup> however there is no avenue available for assessing  
33  
34 the impact of this influence given such a predisposing factor is not routinely collected by  
35  
36 insurance companies. Nevertheless, strategies and resources will need to consider this risk  
37  
38 factor. Similarly, it is not surprising that being female is a risk factor for distress during the  
39  
40 claims process given higher prevalence rates of psychological distress for females are  
41  
42 consistently reported across general populations.<sup>44</sup> This would suggest resources directed at  
43  
44 females to prevent escalation of distress in the claims process appears warranted.

45  
46  
47 Transportation by an ambulance at the time of their accident is perhaps related to severity of  
48  
49 the injury, and future research will be needed to clarify this risk factor. Requiring  
50  
51 rehabilitation was also found to be a significant predictor of psychological distress perhaps  
52  
53 suggesting that some claimants who become psychologically distressed may be receiving  
54  
55  
56  
57  
58  
59  
60

1  
2  
3 rehabilitation regardless of their physical injury severity. This suggests that early intervention  
4  
5 for psychological distress may well reduce the need for extended rehabilitation. Similarly,  
6  
7 resources directed at those who are not at fault of the MVC may help reduce the risk of  
8  
9 psychological distress negatively impacting on the claim's expected settlement times and cost  
10  
11 trajectories. For example, related to at fault status, previous research has found a relationship  
12  
13 between perceived injustice and the high prevalence of occupational disability in whiplash  
14  
15 injuries.<sup>45</sup> Changing to a no fault scheme may reduce the association between fault status and  
16  
17 increased claim settlement times and costs.  
18  
19

20  
21 Limitations of this study need to be discussed. It was not possible to determine pre-  
22  
23 injury presence of psychological distress. It is expected that the presence of pre-injury  
24  
25 psychological distress would have a considerable impact on the presence of psychological  
26  
27 distress during the claims process. However, arguably, proxy measures of pre-injury  
28  
29 psychological distress existed in the study, namely social disadvantage and unemployment,  
30  
31 both highly related to the presence of psychological disorder.<sup>43</sup> These two measures were  
32  
33 found to predict psychological distress during the claim process. Nevertheless, research with  
34  
35 access to pre-injury health data shows that diagnosed psychological/psychiatric illness prior  
36  
37 to injury is a significant risk factor for psychological distress following a MVC incident.<sup>46</sup>  
38  
39 Due to the data being collected in a fault based CTP scheme, very few claimants were at  
40  
41 fault, and this may have been a factor in its predictor status of psychological distress. Clearly,  
42  
43 the predictive capacity of fault status requires further research. The inclusion of only settled  
44  
45 claims has the potential to exclude more claims in which psychological distress played a role  
46  
47 given their propensity to be more lengthy for the claimant. It was also not possible to know  
48  
49 with a high level of accuracy what psychological condition was experienced.  
50  
51  
52

53  
54 This retrospective cohort study has positive implications at several systemic levels.  
55  
56 First, the results reported in this paper can assist general practitioners provide improved  
57  
58  
59  
60

1  
2  
3 healthcare support to their clients knowing that those presenting with psychological distress  
4  
5 in addition to their musculoskeletal injury may require additional support such as referral to a  
6  
7 clinical psychologist or psychiatrist early in the claims process to reduce the risk of the claim  
8  
9 becoming more complex and subsequently more lengthy and expensive. Second, assuming  
10  
11 the goal of insurance companies is to support a claimant through the process of compensation  
12  
13 with effective injury management and timely return to work, the results presented suggest  
14  
15 there are known targets for change (psychological distress), and that specific predictors  
16  
17 available in insurers' personal injury databases can effectively identify who is likely to  
18  
19 benefit from specific distress management strategies. This suggests changes to healthcare  
20  
21 protocols and practices are warranted. For example, in accordance with previous research,  
22  
23 directing additional resources such as screening and treating psychological conditions of  
24  
25 claimants who are at higher risk<sup>9</sup> regardless of whether their psychological condition pre-  
26  
27 dated their MVC provides opportunity for reducing time and costs involved with  
28  
29 compensation claims.  
30  
31  
32  
33  
34  
35  
36  
37  
38  
39  
40  
41  
42  
43  
44  
45  
46  
47  
48  
49  
50  
51  
52  
53  
54  
55  
56  
57  
58  
59  
60

1  
2  
3 **Funding** This research was funded by a competitive grant from the State Insurance  
4  
5 Regulatory Authority (formerly the Motor Accident Authority NSW); MAA ref: 14/366. The  
6  
7 views expressed in this paper are those of the authors only and not those of SIRA's.  
8  
9

10  
11 **Contributors** RG, YT and AC contributed to the study conception and design, analysis and  
12  
13 interpretation of data, drafting of the manuscript and revision based on the comments of the  
14  
15 co-authors. BG and IC contributed to the study design and revision based on comments of  
16  
17 reviewers. All authors approved the submitted manuscript for publication.  
18  
19

20  
21  
22  
23 **Declaration of Interest** None.  
24  
25

26  
27 **Data Sharing Statement** No additional data available.  
28  
29

30  
31  
32 **Acknowledgement** The authors acknowledge and thank the NSW MVC survivors whose  
33  
34 data have been analysed and reported in this publication.  
35  
36  
37  
38  
39  
40  
41  
42  
43  
44  
45  
46  
47  
48  
49  
50  
51  
52  
53  
54  
55  
56  
57  
58  
59  
60

## REFERENCES

1. Department of Transport. Reported road casualties in Great Britain: main results in 2014 2015. Available from: [www.gov.uk/government/uploads/system/uploads/attachment\\_data/file/438040/reported-road-casualties-in-great-britain-main-results-2014-release.pdf](http://www.gov.uk/government/uploads/system/uploads/attachment_data/file/438040/reported-road-casualties-in-great-britain-main-results-2014-release.pdf).
2. Bureau of Infrastructure, Transport, and Regional Economics (BITRE). Road trauma Australia, 2015 statistical summary BITRE, Canberra ACT. 2016.
3. Craig A, Tran, Y., Guest, R., Gopinath, B., Jagnoor, J., Bryant, R. A., Collie, A., Tate, R., Kenardy, J., Middleton, J., Cameron, I. D. The psychological impact of injuries sustained in motor vehicle crashes: Systematic review and meta-analysis. *BMJ Open*. 2016;In press.
4. Guest R, Tran Y, Gopinath B, Cameron ID, Craig A. Prevention of the development of psychological distress following a motor vehicle crash: study protocol for a randomized controlled trial. *Trials*. 2016;17(1):317.
5. Nantulya VM, Reich MR. The neglected epidemic: road traffic injuries in developing countries. *BMJ: Brit Med J*. 2002;324(7346):1139.
6. Peden M. World report on road traffic injury prevention. World Health Organization Geneva; 2004.
7. Heron-Delaney M, Kenardy J, Charlton E, Matsuoka Y. A systematic review of predictors of posttraumatic stress disorder (PTSD) for adult road traffic crash survivors. *Injury*. 2013;44(11):1413-22.
8. Holbrook TL, Anderson JP, Sieber WJ, Browner D, Hoyt DB. Outcome after major trauma: 12-month and 18-month follow-up results from the Trauma Recovery Project. *Journal of Trauma and Acute Care Surgery*. 1999;46(5):765-73.
9. Papadakaki M, Ferraro OE, Orsi C, Otte D, Tzamalouka G, Von-der-Geest M, et al. Psychological distress and physical disability in patients sustaining severe injuries in road traffic crashes: Results from a one-year cohort study from three European countries. *Injury*. 2017;48(2):297-306.
10. Blanchard EB, Hickling EJ, Malta LS, Freidenberg BM, Canna MA, Kuhn E, et al. One- and two-year prospective follow-up of cognitive behavior therapy or supportive psychotherapy. *Behav Res Ther*. 2004;42(7):745-59.
11. Grant GM, O'Donnell ML, Spittal MJ, Creamer M, Studdert DM. Relationship between stressfulness of claiming for injury compensation and long-term recovery: a prospective cohort study. *JAMA psychiatry*. 2014;71(4):446-53.
12. Elbers NA, Hulst L, Cuijpers P, Akkermans AJ, Bruinvels DJ. Do compensation processes impair mental health? A meta-analysis. *Injury*. 2013;44(5):674-83.
13. Harris IA, Young JM, Jalaludin BB, Solomon MJ. The effect of compensation on general health in patients sustaining fractures in motor vehicle trauma. *J Orthop Trauma*. 2008;22(4):216-20.
14. Gabbe BJ, Cameron PA, Williamson OD, Edwards ER, Graves SE, Richardson MD. The relationship between compensable status and long-term patient outcomes following orthopaedic trauma. *Med J Aust*. 2007;187(1):14.
15. O'Donnell ML, Creamer MC, McFarlane AC, Silove D, Bryant RA. Does access to compensation have an impact on recovery outcomes after injury? *Med J Aust*. 2010;192(6):328-33.
16. Shuman DW. Psychology of Compensation in Tort Law, *The. U Kan L Rev*. 1994;43:39.
17. Murgatroyd D, Lockwood K, Garth B, Cameron ID. The perceptions and experiences of people injured in motor vehicle crashes in a compensation scheme setting: a qualitative study. *BMC Public Health*. 2015;15(1):423.



- 1
  - 2
  - 3
  - 4
  - 5
  - 6
  - 7
  - 8
  - 9
  - 10
  - 11
  - 12
  - 13
  - 14
  - 15
  - 16
  - 17
  - 18
  - 19
  - 20
  - 21
  - 22
  - 23
  - 24
  - 25
  - 26
  - 27
  - 28
  - 29
  - 30
  - 31
  - 32
  - 33
  - 34
  - 35
  - 36
  - 37
  - 38
  - 39
  - 40
  - 41
  - 42
  - 43
  - 44
  - 45
  - 46
  - 47
  - 48
  - 49
  - 50
  - 51
  - 52
  - 53
  - 54
  - 55
  - 56
  - 57
  - 58
  - 59
  - 60
18. Air TM, McFarlane AC, Psychother D. Posttraumatic stress disorder and its impact on the economic and health costs of motor vehicle accidents in South Australia. *J Clin Psychiatry*. 2003;64(2):175-81.
19. Gabbe BJ, Simpson PM, Cameron PA, Ekegren CL, Edwards ER, Page R, et al. Association between perception of fault for the crash and function, return to work and health status 1 year after road traffic injury: a registry-based cohort study. *BMJ open*. 2015;5(11):e009907.
20. Cassidy JD, Carroll LJ, Cote P, Lemstra M, Berglund A, Nygren A. Effect of eliminating compensation for pain and suffering on the outcome of insurance claims for whiplash injury. *N Engl J Med*. 2000;342(16):1179-86.
21. Organization WH. Global health risks: mortality and burden of disease attributable to selected major risks: World Health Organization; 2009.
22. Murray CJL, Abraham J, Ali MK, Alvarado M, Atkinson C, Baddour LM, et al. The State of US health, 1990-2010: Burden of diseases, injuries, and risk factors. *JAMA - Journal of the American Medical Association*. 2013;310(6):591-608.
23. Littleton S, Cameron ID, Poustie S, Hughes D, Robinson B, Neeman T, et al. The association of compensation on longer term health status for people with musculoskeletal injuries following road traffic crashes: emergency department inception cohort study. *Injury*. 2011;42(9):927-33.
24. Giannoudis PV, Mehta SS, Tsiridis E. Incidence and outcome of whiplash injury after multiple trauma. *Spine (Phila Pa 1976)*. 2007;32(7):776-81.
25. Littleton SM, Cameron ID, Poustie SJ, Hughes DC, Robinson BJ, Neeman T, et al. The association of compensation on longer term health status for people with musculoskeletal injuries following road traffic crashes: Emergency department inception cohort study. *Injury-International Journal of the Care of the Injured*. 2011;42(9):927-33.
26. Hendriks EJ, Scholten-Peeters GG, van der Windt DA, Neeleman-van der Steen CW, Oostendorp RA, Verhagen AP. Prognostic factors for poor recovery in acute whiplash patients. *Pain*. 2005;114(3):408-16.
27. Sterling M, Kenardy J. Physical and psychological aspects of whiplash: Important considerations for primary care assessment. *Man Ther*. 2008;13(2):93-102.
28. Berglund A, Bodin L, Jensen I, Wiklund A, Alfredsson L. The influence of prognostic factors on neck pain intensity, disability, anxiety and depression over a 2-year period in subjects with acute whiplash injury. *Pain*. 2006;125(3):244-56.
29. Carroll LJ, Cassidy JD, Cote P. The role of pain coping strategies in prognosis after whiplash injury: Passive coping predicts slowed recovery. *Pain*. 2006;124(1-2):18-26.
30. Sterling M, Kenardy J, Jull G, Vicenzino B. The development of psychological changes following whiplash injury. *Pain*. 2003;106(3):481-9.
31. Radanov BP, Begré S, Sturzenegger M, Augustiny KF. Course of psychological variables in whiplash injury—a 2-year follow-up with age, gender and education pair-matched patients. *Pain*. 1996;64(3):429-34.
32. Ameratunga SN, Norton RN, Bennett DA, Jackson RT. Risk of disability due to car crashes: A review of the literature and methodological issues. *Injury*. 2004;35(11):1116-27.
33. Australian Consortium for Classification Development. 1998. Available from: [https://www.google.com.au/?gws\\_rd=ssl#safe=off&q=www.accd.net.au%2Ffid10.aspx](https://www.google.com.au/?gws_rd=ssl#safe=off&q=www.accd.net.au%2Ffid10.aspx).
34. State Insurance Regulatory Authority. Fees, Costs and Charges; 2015. Available from: <http://www.sira.nsw.gov.au/motor-accidents/for-professionals/fees-costs-and-charges>.
35. Cutter A. Comparison across CTP schemes. Australasia: Institute of Actuaries of Australia; 2007.
36. Stevenson M, Segui-Gomez M, Lescohier I, Di Scala C, McDonald-Smith G. An overview of the injury severity score and the new injury severity score. *Injury Prev*. 2001;7(1):10-3.
37. Pink B. Information paper: an introduction to socio-economic indexes for areas (SEIFA), 2006. Canberra: Australian Bureau of Statistics (ABS). 2008.

- 1  
2  
3 38. Organization WH. The ICD-10 classification of mental and behavioural disorders: clinical  
4 descriptions and diagnostic guidelines: Geneva: World Health Organization; 1992.  
5 39. Hosmer Jr DW, Lemeshow S. Applied logistic regression: John Wiley & Sons; 2004.  
6 40. Large MM. Relationship between compensation claims for psychiatric injury and severity of  
7 physical injuries from motor vehicle accidents. *Med J Aust.* 2001;175(3):129-33.  
8 41. Andrews G, Henderson S, Hall W. Prevalence, comorbidity, disability and service utilisation.  
9 *Br J Psychiatry.* 2001;178(2):145-53.  
10 42. Lloyd C, Waghorn G, McHugh C. Musculoskeletal disorders and comorbid depression:  
11 implications for practice. *Aust Occup Ther J.* 2008;55(1):23-9.  
12 43. Mezuk B, Rafferty JA, Kershaw KN, Hudson D, Abdou CM, Lee H, et al. Reconsidering the role  
13 of social disadvantage in physical and mental health: stressful life events, health behaviors,  
14 race, and depression. *Am J Epidemiol.* 2010;172(11):1238-49.  
15 44. Wilhelm K, Mitchell P, Slade T, Brownhill S, Andrews G. Prevalence and correlates of DSM-IV  
16 major depression in an Australian national survey. *J Affect Disord.* 2003;75(2):155-62.  
17 45. Sullivan MJ, Davidson N, Garfinkel B, Siriapaipant N, Scott W. Perceived injustice is  
18 associated with heightened pain behavior and disability in individuals with whiplash injuries.  
19 *Psychol Inj Law.* 2009;2(3-4):238-47.  
20 46. Ehlers A, Mayou RA, Bryant B. Psychological predictors of chronic posttraumatic stress  
21 disorder after motor vehicle accidents. *J Abnorm Psychol.* 1998;107(3):508.  
22  
23  
24  
25  
26  
27  
28  
29  
30  
31  
32  
33  
34  
35  
36  
37  
38  
39  
40  
41  
42  
43  
44  
45  
46  
47  
48  
49  
50  
51  
52  
53  
54  
55  
56  
57  
58  
59  
60

STROBE Statement—Checklist of items that should be included in reports of *cohort studies*

|                              | Item No | Recommendation                                                                                                                                                                                    |
|------------------------------|---------|---------------------------------------------------------------------------------------------------------------------------------------------------------------------------------------------------|
| <b>Title and abstract</b>    | 1       | (a) Indicate the study's design with a commonly used term in the title or the abstract<br>Page 1-2                                                                                                |
|                              |         | (b) Provide in the abstract an informative and balanced summary of what was done and what was found<br>Page 2                                                                                     |
| <b>Introduction</b>          |         |                                                                                                                                                                                                   |
| Background/rationale         | 2       | Explain the scientific background and rationale for the investigation being reported<br>Pages 5-7                                                                                                 |
| Objectives                   | 3       | State specific objectives, including any prespecified hypotheses<br>Page 7                                                                                                                        |
| <b>Methods</b>               |         |                                                                                                                                                                                                   |
| Study design                 | 4       | Present key elements of study design early in the paper<br>Page 8                                                                                                                                 |
| Setting                      | 5       | Describe the setting, locations, and relevant dates, including periods of recruitment, exposure, follow-up, and data collection<br>Pages 7-9                                                      |
| Participants                 | 6       | (a) Give the eligibility criteria, and the sources and methods of selection of participants. Describe methods of follow-up<br>Pages 7-8                                                           |
|                              |         | (b) For matched studies, give matching criteria and number of exposed and unexposed<br>N/A                                                                                                        |
| Variables                    | 7       | Clearly define all outcomes, exposures, predictors, potential confounders, and effect modifiers. Give diagnostic criteria, if applicable<br>Pages 8-9                                             |
| Data sources/<br>measurement | 8*      | For each variable of interest, give sources of data and details of methods of assessment (measurement). Describe comparability of assessment methods if there is more than one group<br>Pages 8-9 |
| Bias                         | 9       | Describe any efforts to address potential sources of bias<br>19                                                                                                                                   |
| Study size                   | 10      | Explain how the study size was arrived at<br>Page 9                                                                                                                                               |
| Quantitative variables       | 11      | Explain how quantitative variables were handled in the analyses. If applicable, describe which groupings were chosen and why<br>Page 8-9                                                          |
| Statistical methods          | 12      | (a) Describe all statistical methods, including those used to control for confounding<br>Page 9-10                                                                                                |
|                              |         | (b) Describe any methods used to examine subgroups and interactions<br>N/A                                                                                                                        |
|                              |         | (c) Explain how missing data were addressed<br>Page 9-10                                                                                                                                          |
|                              |         | (d) If applicable, explain how loss to follow-up was addressed<br>N/A                                                                                                                             |
|                              |         | (e) Describe any sensitivity analyses<br>Page 13 & 16                                                                                                                                             |

| <b>Results</b>           |     |                                                                                                                                                                                                                                                                                                                                                                                                                                           |
|--------------------------|-----|-------------------------------------------------------------------------------------------------------------------------------------------------------------------------------------------------------------------------------------------------------------------------------------------------------------------------------------------------------------------------------------------------------------------------------------------|
| Participants             | 13* | (a) Report numbers of individuals at each stage of study—eg numbers potentially eligible, examined for eligibility, confirmed eligible, included in the study, completing follow-up, and analysed<br>Page 7-8<br>(b) Give reasons for non-participation at each stage<br>Page 7-9<br>(c) Consider use of a flow diagram<br>N/A                                                                                                            |
| Descriptive data         | 14* | (a) Give characteristics of study participants (eg demographic, clinical, social) and information on exposures and potential confounders<br>Page 7-8 & 10-11<br>(b) Indicate number of participants with missing data for each variable of interest<br>N/A<br>(c) Summarise follow-up time (eg, average and total amount)<br>N/A                                                                                                          |
| Outcome data             | 15* | Report numbers of outcome events or summary measures over time<br>N/A                                                                                                                                                                                                                                                                                                                                                                     |
| Main results             | 16  | (a) Give unadjusted estimates and, if applicable, confounder-adjusted estimates and their precision (eg, 95% confidence interval). Make clear which confounders were adjusted for and why they were included<br>Page 15-16<br>(b) Report category boundaries when continuous variables were categorized<br>N/A<br>(c) If relevant, consider translating estimates of relative risk into absolute risk for a meaningful time period<br>N/A |
| Other analyses           | 17  | Report other analyses done—eg analyses of subgroups and interactions, and sensitivity analyses<br>N/A                                                                                                                                                                                                                                                                                                                                     |
| <b>Discussion</b>        |     |                                                                                                                                                                                                                                                                                                                                                                                                                                           |
| Key results              | 18  | Summarise key results with reference to study objectives<br>Pages 16-20                                                                                                                                                                                                                                                                                                                                                                   |
| Limitations              | 19  | Discuss limitations of the study, taking into account sources of potential bias or imprecision. Discuss both direction and magnitude of any potential bias<br>Page 19                                                                                                                                                                                                                                                                     |
| Interpretation           | 20  | Give a cautious overall interpretation of results considering objectives, limitations, multiplicity of analyses, results from similar studies, and other relevant evidence<br>Page 17-20                                                                                                                                                                                                                                                  |
| Generalisability         | 21  | Discuss the generalisability (external validity) of the study results<br>Page 19-20                                                                                                                                                                                                                                                                                                                                                       |
| <b>Other information</b> |     |                                                                                                                                                                                                                                                                                                                                                                                                                                           |
| Funding                  | 22  | Give the source of funding and the role of the funders for the present study and, if applicable, for the original study on which the present article is based<br>Page 21                                                                                                                                                                                                                                                                  |

\*Give information separately for exposed and unexposed groups.

1 **Note:** An Explanation and Elaboration article discusses each checklist item and gives methodological background and  
2 published examples of transparent reporting. The STROBE checklist is best used in conjunction with this article (freely  
3 available on the Web sites of PLoS Medicine at <http://www.plosmedicine.org/>, Annals of Internal Medicine at  
4 <http://www.annals.org/>, and Epidemiology at <http://www.epidem.com/>). Information on the STROBE Initiative is  
5 available at <http://www.strobe-statement.org>.  
6  
7  
8  
9  
10  
11  
12  
13  
14  
15  
16  
17  
18  
19  
20  
21  
22  
23  
24  
25  
26  
27  
28  
29  
30  
31  
32  
33  
34  
35  
36  
37  
38  
39  
40  
41  
42  
43  
44  
45  
46  
47  
48  
49  
50  
51  
52  
53  
54  
55  
56  
57  
58  
59  
60

For peer review only

# BMJ Open

## Psychological distress following a motor vehicle crash: compelling evidence from a state-wide retrospective study examining settlement times and costs of compensation claims

|                                    |                                                                                                                                                                                                                                                                  |
|------------------------------------|------------------------------------------------------------------------------------------------------------------------------------------------------------------------------------------------------------------------------------------------------------------|
| Journal:                           | <i>BMJ Open</i>                                                                                                                                                                                                                                                  |
| Manuscript ID                      | bmjopen-2017-017515.R1                                                                                                                                                                                                                                           |
| Article Type:                      | Research                                                                                                                                                                                                                                                         |
| Date Submitted by the Author:      | 15-Jun-2017                                                                                                                                                                                                                                                      |
| Complete List of Authors:          | Guest, Rebecca; University of Sydney,<br>Tran, Yvonne<br>Gopinath, Bamini; University of Sydney, Centre for Vision Research<br>Cameron, Ian; University of Sydney, Rehabilitation Studies Unit<br>Craig, Ashley; University of Sydney, Northern Clinical School; |
| <b>Primary Subject<br>Heading</b>: | Rehabilitation medicine                                                                                                                                                                                                                                          |
| Secondary Subject Heading:         | Mental health, Rehabilitation medicine                                                                                                                                                                                                                           |
| Keywords:                          | motor vehicle crash, psychological distress, musculoskeletal injury,<br>compensation, post traumatic stress disorder                                                                                                                                             |
|                                    |                                                                                                                                                                                                                                                                  |

SCHOLARONE™  
Manuscripts

1  
2  
3 Psychological distress following a motor vehicle crash: compelling evidence from a state-  
4 wide retrospective study examining settlement times and costs of compensation claims  
5  
6  
7  
8  
9  
10  
11  
12  
13

14 Rebecca Guest<sup>a</sup>, Yvonne Tran<sup>a</sup>, Bamini Gopinath<sup>a</sup>, Ian D Cameron<sup>a</sup>, Ashley Craig<sup>a</sup>  
15  
16  
17  
18  
19  
20  
21  
22

23 <sup>a</sup>John Walsh Centre for Rehabilitation Research, Kolling Institute for Medical Research,  
24 Sydney Medical School-Northern, The University of Sydney  
25  
26  
27  
28

29 Correspondence to: Rebecca Guest, John Walsh Centre for Rehabilitation Research, Kolling  
30 Institute for Medical Research, Sydney Medical School-Northern, The University of Sydney  
31 Corner Reserve Road and First Avenue, Royal North Shore Hospital, St Leonards, NSW  
32 2065, Australia; email: rebecca.guest@sydney.edu.au; telephone: +61 2 99264962; fax: 61 2  
33 99264045.  
34  
35  
36  
37  
38  
39  
40  
41  
42

43 **Key Words:** motor vehicle crash, psychological distress, musculoskeletal injury,  
44 compensation, post-traumatic stress disorder  
45  
46

47 **Word count 3896 Tables 3 Figures 0**  
48  
49  
50  
51  
52  
53  
54  
55  
56  
57  
58  
59  
60

## Abstract

**Objective:** To determine whether psychological distress associated with musculoskeletal injuries sustained in a motor vehicle crash (MVC), regardless of time of onset, impacts compensation outcomes such as claim settlement times and costs. Second, to identify factors routinely collected by insurance companies that contribute to psychological distress during the compensation process.

**Design:** State-wide retrospective study.

**Data Source:** Analysis of the New South Wales state-wide (Australia) injury register for MVC survivors who lodged a compensation claim from 2011 to 2013.

**Participants:** 6,341 adults who sustained a musculoskeletal injury, and who settled a claim for injury after an MVC. Participants included those diagnosed with psychological distress (n=607) versus those not (n=5,734).

**Main Outcome Measures:** Time to settlement and total costs of claims, as well as socio-demographic and injury characteristics that may contribute to elevated psychological distress, such as socioeconomic disadvantage, and injury severity.

**Results:** Psychological distress in those with a musculoskeletal injury was associated with significantly longer settlement times (an additional 17 weeks) and considerably higher costs (an additional A\$41, 575.00, or 4.3 times more expensive). Multivariate logistic regression analysis identified risk factors for psychological distress including being female, social disadvantage, unemployment prior to the claim, not being at fault in the MVC, requiring ambulance transportation and rehabilitation as part of recovery.

**Conclusions:** Results provide compelling evidence that psychological distress has an adverse impact on people with musculoskeletal injury as they progress through compensation. Findings suggest additional resources should be directed toward claimants who are at risk (e.g. the socially disadvantaged or those unemployed prior to the claim), the



1  
2  
3 major aim being to reduce risk of psychological distress, such as post-traumatic stress  
4  
5 disorder, and associated risk of increased settlement times and claim costs. Prospective  
6  
7 studies are now required that investigate treatment strategies for those at risk of psychological  
8  
9 distress associated with an MVC.  
10  
11  
12  
13  
14  
15  
16  
17  
18  
19  
20  
21  
22  
23  
24  
25  
26  
27  
28  
29  
30  
31  
32  
33  
34  
35  
36  
37  
38  
39  
40  
41  
42  
43  
44  
45  
46  
47  
48  
49  
50  
51  
52  
53  
54  
55  
56  
57  
58  
59  
60

### Strengths and limitations of this study

- This is the first study to investigate the impact of psychological distress in all claimants experiencing a musculoskeletal injury and who lodge and settle their compensation claim for an MVC over a 2 year period in the state of NSW. It was revealed that the presence of psychological distress greatly increased settlement times and costs.
- The study identified risk factors associated with an increased likelihood of psychological distress after an MVC.
- The study has the potential to change medical practice and insurance policy for those at risk of psychological distress following an MVC.
- It was not possible to determine whether psychological distress was present prior to the MVC, as this information is not routinely collected by insurance companies.

## INTRODUCTION

Motor vehicle crashes (MVC) remain a major source of physical injury and distress. For example, in the UK there were 194,477 reported casualties in a traffic accident in 2014<sup>1</sup> while in Australia in 2013 the rate of annual hospitalised injuries associated with an MVC was 151.7 per 100,000.<sup>2</sup> Psychological distress associated with an MVC has been shown to be substantial and prevalent.<sup>3-7</sup> A recent meta-analysis investigated the extent of psychological distress associated with an MVC.<sup>3</sup> Regardless of whether the psychological distress occurred prior to or after the MVC, the study revealed that traumatic brain injury, spinal cord injury and musculoskeletal injury (i.e. whiplash) resulted in significantly elevated levels of distress<sup>3</sup> and psychological distress has been shown to remain elevated for at least 3 years post-MVC.<sup>3</sup><sup>8-10</sup> Recent prospective research found 1 in 2 persons suffered elevated rates of psychological distress (e.g. depression) soon after the MVC and many of these continue to experience elevated distress 12 months after the MVC.<sup>9</sup> Factors such as more severe physical injury, older age, and past negative emotional reactions to distress were associated with elevated psychological distress 12 months post-MVC.<sup>9</sup> For the purpose of this study, psychological distress is defined as an unpleasant mental condition perceived as disturbing and which can impede daily functioning, with mental symptoms including agitation, fatigue, confusion, loss of motivation and depressed mood.

Research suggests the compensation process following an MVC increases distress, for example, health outcomes of people who lodge injury-related compensation claims are more likely to have higher levels of distress than those who do not claim.<sup>11-17</sup> Furthermore, preliminary research suggests when a person has experienced a physical injury as well as psychological distress, the cost of their claim has been shown to double.<sup>18</sup> Other research has found poorer outcomes for claimants who were not at-fault compared to those at-fault.<sup>19</sup> The potential negative impact of psychological distress in the claims process is clearly undesirable

1  
2  
3 in terms of complicating medical treatment for the injured person, and challenging policy  
4 direction and effectiveness for insurers. A more desirable outcome is to minimise time spent  
5 in the compensation process, because this would likely reduce the negative impact on the  
6 individual's health, and contain claim costs for healthcare systems and insurers.<sup>20</sup>  
7  
8  
9

10  
11 Musculoskeletal injuries are common following an MVC and often lead to  
12 compensation claims<sup>21-23</sup> and the risk of developing psychological distress with this physical  
13 injury is high.<sup>3 24</sup> Musculoskeletal injuries typically involve soft tissue injuries to the lower  
14 back, shoulders, hips and knees as well as whiplash injuries, and account for more than  
15 65,000 injuries in Australia each year following an MVC, at a cost in excess of A\$950m.<sup>25</sup>  
16  
17 Barriers to recovery from MVC-related musculoskeletal injuries include high initial pain  
18 intensity,<sup>26 27</sup> being female,<sup>20 28</sup> involvement in the compensation claims process<sup>14 20</sup> and  
19 elevated psychological distress.<sup>29 30</sup> Furthermore, recent research found significantly  
20 increased levels of psychological distress for MVC related whiplash-associated disorder  
21 (WAD) compared to controls.<sup>3 31</sup>  
22  
23  
24  
25  
26  
27  
28  
29  
30  
31  
32  
33

34 A review of research that focussed on disability arising from an MVC concluded that  
35 there was a need to clarify rates of disability arising from an MVC, especially with regard to  
36 methodological issues and complicating factors like compensation.<sup>32</sup> This is also true for the  
37 impact of psychological distress following an MVC, including the influence of involvement  
38 in compensation claims.<sup>3 9</sup> Research in this area has been limited by uncertain diagnoses of  
39 psychological distress disorders and small sample sizes. In contrast, the research presented in  
40 this paper has addressed many of the limitations of prior research. For instance, it utilised a  
41 database of 6,341 persons with musculoskeletal injury from the state-wide injury register of  
42 the New South Wales (NSW) State Insurance Regulatory Authority (SIRA), the authority that  
43 administers the NSW Compulsory Third Party (CTP) scheme. This state-wide register also  
44 provides records with confirmed diagnoses of psychological distress, based on the  
45  
46  
47  
48  
49  
50  
51  
52  
53  
54  
55  
56  
57  
58  
59  
60

1  
2  
3 International Statistical Classification of Disease and Related Health Problems, Tenth  
4  
5 Revision, Australian Modification (ICD-10-AM),<sup>33</sup> regardless of when the psychological  
6  
7 distress was first diagnosed. The NSW CTP scheme is a fault based scheme with limited  
8  
9 access to entitlements for those at fault. Its purpose is to compensate those with injuries who  
10  
11 were not at fault in the MVC with the claim requiring police and medical reports as evidence,  
12  
13 in addition to a personal injury claim form.<sup>34</sup> An estimated 55% of all NSW MVC-related  
14  
15 injuries result in the lodgement of a CTP claim.<sup>35</sup>  
16  
17

18  
19 The objective of this research was to analyse the data of all NSW MVC survivors who  
20  
21 sustained a musculoskeletal injury and who settled their claim over a two year period.  
22  
23 Compensation outcomes of those without diagnosed psychological distress were then  
24  
25 compared to those with diagnosed psychological distress. Specifically, the aim was to  
26  
27 determine the impact of psychological distress, regardless of time of onset, on claim  
28  
29 settlement times and total costs.<sup>34</sup> A further aim was to determine factors, routinely collected  
30  
31 by NSW CTP insurance companies and collated by SIRA, that predict elevated risk of having  
32  
33 psychological distress. Accordingly, findings should address 2 key research questions: 1.  
34  
35 whether psychological distress is associated with longer claim time to completion and greater  
36  
37 claim costs, and 2. what injury or demographic characteristics are associated with  
38  
39 psychological distress. The findings should be beneficial for informing general practitioners  
40  
41 and insurer policymakers, and thus improve healthcare practices for injury-related  
42  
43 compensation claimants.  
44  
45  
46  
47  
48

## 49 **METHOD**

### 50 **Participants**

51  
52 Permission was sought and granted on 22<sup>nd</sup> November 2016 from SIRA to access a total of  
53  
54 24,164 claims from the Personal Injury Register (PIR) of SIRA to determine their potential  
55  
56  
57  
58  
59  
60

1  
2  
3 inclusion in the analysis. The PIR contains all MVC-related claims that occur in NSW.  
4  
5 Inclusion criteria consisted of i) the injured adult (18+) having a musculoskeletal injury and  
6  
7 ii) the claim had been lodged and also settled over a 27 month period (October, 2011-  
8  
9 December, 2013). Claims which had been lodged but not settled, and claims involving  
10  
11 catastrophic injuries such as spinal cord injury and severe traumatic brain injury were  
12  
13 excluded (catastrophic injury related claims are directed toward an alternative scheme in  
14  
15 NSW). This resulted in 6,341 participants who had experienced an MVC and sustained a  
16  
17 musculoskeletal injury, and who lodged and settled a claim in NSW, Australia between  
18  
19 October 2011 and December 2013 (27 months). The combined cohort data was received from  
20  
21 SIRA in de-identified form and therefore human research ethics approval was deemed not to  
22  
23 be required.  
24  
25  
26  
27  
28

### 29 **Measurements**

30  
31 Musculoskeletal injury severity was assessed using the New Injury Severity Score (NISS)  
32  
33 which computes the simple sum of squares of the three most severe injuries identified by the  
34  
35 abbreviated injury scale (AIS).<sup>36</sup> The Index of Relative Socioeconomic Disadvantage (IRSD)  
36  
37 was calculated from the Socio Economic Index for Areas (SEIFA) which ranks areas in  
38  
39 Australia according to relative socio-economic advantage and disadvantage.<sup>37</sup> Rehabilitation  
40  
41 Indicator refers to whether the claimant required rehabilitation as part of their recovery plan.  
42  
43 Presence of psychological distress, such as post-traumatic stress disorder or major depressive  
44  
45 disorders, was determined using the ICD-10-AM Classification of Mental and Behavioural  
46  
47 Disorders: Clinical Descriptions and Diagnostic Guidelines<sup>38</sup> at some time within the claims  
48  
49 process (the database is progressively updated over the duration of the claim). Psychological  
50  
51 distress was determined from sources such as reports and independent assessments from  
52  
53 General Practitioners, Psychiatrists, and Psychologists. It is recognised that psychological  
54  
55  
56  
57  
58  
59  
60

1  
2  
3 distress could be present prior to the claimant's MVC, and that this has the potential to  
4  
5 influence psychological distress post-MVC.<sup>3</sup> However, timing of onset of psychological  
6  
7 distress was not the aim of this research given such information is not routinely collected by  
8  
9 NSW insurance companies and is therefore not collated by the NSW regulatory authority. Of  
10  
11 the 6,341, those with musculoskeletal injury without psychological distress numbered 5,374  
12  
13 (90.4%) and those with both musculoskeletal injury and psychological distress numbered 607  
14  
15 (9.6%).  
16  
17

### 18 19 20 **Statistical analysis** 21

22  
23 A retrospective design was employed to analyse the PIR datasets of all NSW MVC survivors  
24  
25 at the time of their claim lodgement (both minor claims, that is, 'Accident Notifications  
26  
27 Forms' and full claims) over 27 months, and who met the inclusion criteria. Reporting was  
28  
29 guided by the relevant checklist (see STROBE Statement in supplemental file 1). Descriptive  
30  
31 statistics were used to summarise demographic and claim/accident characteristics of the  
32  
33 participants by psychological distress status. The differences in the demographics and claim  
34  
35 characteristics between those that claimed compensation and those that did not were  
36  
37 compared using analysis of variance (ANOVA) tests for continuous variables and chi-square  
38  
39 tests for categorical variables. In order to determine predictive factors, logistic regression was  
40  
41 employed. Only statistically significant socio-demographic and injury variables from Table 1  
42  
43 were included in the logistic regression analysis from which unadjusted odds ratios were  
44  
45 determined. Following this, all the variables were again used in backward elimination ( $P < .05$ )  
46  
47 logistic regression, and adjusted odds ratios calculated.  
48  
49

50  
51  
52 Logistic regression can provide information on factors that are associated with having  
53  
54 psychological distress and advantages of employing this statistical methodology include its  
55  
56 ability for isolating predictors, and for producing odds ratios.<sup>39</sup> In order to determine  
57  
58  
59  
60

1  
2  
3 predictive factors, logistic regression was employed. Potential predictor variables from the  
4 socio-demographic and injury variables from Table 1 were considered and significant  
5 variables were retained for the logistic regression analysis. Univariate analysis on the  
6 significant variables was conducted from which the unadjusted odds ratios were determined.  
7 Following this, variables for the final model were selected using a backward elimination  
8 technique based on changes in likelihood ratios. Significant variables ( $P < .05$ ) from the  
9 logistic regression were used in the final model and adjusted odds ratios calculated. Whilst  
10 Table 1 showed there was a significantly higher probability ( $P < .01$ ) for those who had  
11 psychological distress also having legal representation (61.0%) compared to musculoskeletal  
12 injury only claimants (18.9%), this injury characteristic was excluded from the logistic  
13 regression as legal representation can be instigated not only at the time of the claim  
14 lodgement, but at any time throughout the claims process, thus making it difficult to establish  
15 its predictive association with psychological distress. Again, it should be noted that  
16 psychological distress can develop before the injury, as well as at any time throughout the  
17 claims process.

18  
19  
20  
21  
22  
23  
24  
25  
26  
27  
28  
29  
30  
31  
32  
33  
34  
35  
36 All variables selected for the logistic regression have been investigated in prior  
37 studies for their relevance to injury outcomes following MVC.<sup>11 40</sup> To determine the  
38 predictive capacity of the logistic regression model, ROC estimates were calculated. The  
39 ROC plots the true-positive rate (sensitivity) against the false-positive rate (1 – specificity) in  
40 detecting factors that influence greater time to claim settlement and elevated costs for MVC  
41 claimants with musculoskeletal injuries with and without psychological distress.

## 42 43 44 45 46 47 48 49 50 51 **RESULTS**

52  
53  
54 Socio-demographic and injury characteristics are shown in Table 1. All factors shown in  
55 Table 1 were either pre-injury factors or assessed at the time of lodging the claim, except for  
56  
57  
58  
59  
60



1  
2  
3 legal representation which can potentially occur at any time during the claims process. Mean  
4  
5 days from MVC to lodgement of a minor 'no fault' claim (Accident Notification Form) was  
6  
7 23 days (SD=22.8) and to full claim lodgement was 110 days (SD=84.0).  
8  
9  
10

11  
12 Table 1 Socio-demographic and injury characteristics of NSW MVC claimants 2011-2013  
13

| 14<br>15<br>16<br>17<br>18<br>19<br>20<br>21<br>22<br>23<br>24<br>25<br>26<br>27<br>28<br>29<br>30<br>31<br>32<br>33<br>34<br>35<br>36<br>37<br>38<br>39<br>40<br>41<br>42<br>43<br>44<br>45<br>46<br>47<br>48<br>49<br>50<br>51<br>52<br>53<br>54<br>55<br>56<br>57<br>58<br>59<br>60 | Variable                                                       | Musculoskeletal<br>Injury<br>(n=5734) | Musculoskeletal<br>Injury + Psych<br>Distress<br>(n=607) | P     |
|----------------------------------------------------------------------------------------------------------------------------------------------------------------------------------------------------------------------------------------------------------------------------------------|----------------------------------------------------------------|---------------------------------------|----------------------------------------------------------|-------|
|                                                                                                                                                                                                                                                                                        | Age (years), Mean (SD)                                         | 42.8 (16.3)                           | 44.4 (15.9)                                              | 0.02  |
|                                                                                                                                                                                                                                                                                        | <b>New Injury Severity Score, No (%)</b>                       |                                       |                                                          | 0.02  |
|                                                                                                                                                                                                                                                                                        | Minor- moderate 1-8                                            | 5259 (91.9)                           | 539 (88.8)                                               |       |
|                                                                                                                                                                                                                                                                                        | Serious 9-15                                                   | 348 (6.1)                             | 54 (8.9)                                                 |       |
|                                                                                                                                                                                                                                                                                        | Severe- critical 16-75                                         | 114 (2.0)                             | 14 (2.3)                                                 |       |
|                                                                                                                                                                                                                                                                                        | <b>Index of Relative Socioeconomic Disadvantage, Mean (SD)</b> | 1017.0 (86.4)                         | 986.5 (89.2)                                             | <0.01 |
|                                                                                                                                                                                                                                                                                        | <b>Index of Relative Socioeconomic Disadvantage, No (%)</b>    |                                       |                                                          | <0.01 |
|                                                                                                                                                                                                                                                                                        | Most disadvantaged                                             | 983 (17.4)                            | 182 (30.3)                                               |       |
|                                                                                                                                                                                                                                                                                        | Disadvantaged                                                  | 803 (14.2)                            | 72 (12.5)                                                |       |
|                                                                                                                                                                                                                                                                                        | Average                                                        | 1007 (17.8)                           | 113 (18.8)                                               |       |
|                                                                                                                                                                                                                                                                                        | Advantaged                                                     | 853 (15.1)                            | 95 (15.8)                                                |       |
|                                                                                                                                                                                                                                                                                        | Most advantaged                                                | 1996 (35.4)                           | 136 (22.6)                                               |       |
|                                                                                                                                                                                                                                                                                        | <b>Male, No (%)</b>                                            | 2417 (42.2)                           | 212 (34.9)                                               | <0.01 |
|                                                                                                                                                                                                                                                                                        | <b>Employment Status, No (%) (Yes)</b>                         | 4197 (73.2)                           | 364 (60.0)                                               | <0.01 |
|                                                                                                                                                                                                                                                                                        | <b>Occupation skill level, No (%)</b>                          |                                       |                                                          | <0.01 |
|                                                                                                                                                                                                                                                                                        | Managers and Administrators                                    | 567 (9.9)                             | 34 (5.6)                                                 |       |
|                                                                                                                                                                                                                                                                                        | Professionals                                                  | 1026 (17.9)                           | 34 (5.6)                                                 |       |
|                                                                                                                                                                                                                                                                                        | Para-professionals                                             | 213 (3.7)                             | 74 (12.2)                                                |       |
|                                                                                                                                                                                                                                                                                        | Tradespersons                                                  | 257 (4.5)                             | 17 (12.2)                                                |       |
|                                                                                                                                                                                                                                                                                        | Clerks                                                         | 600 (10.5)                            | 26 (4.3)                                                 |       |
|                                                                                                                                                                                                                                                                                        | Sales persons and Personal Service workers                     | 680 (11.9)                            | 63 (10.4)                                                |       |
|                                                                                                                                                                                                                                                                                        | Plant and Machine Operators and Drivers                        | 225 (3.9)                             | 64 (10.5)                                                |       |
|                                                                                                                                                                                                                                                                                        | Labourers and related workers                                  | 537 (9.4)                             | 22 (3.6)                                                 |       |
|                                                                                                                                                                                                                                                                                        | <b>At Fault* (No), No (%)</b>                                  | 4866 (87.9)                           | 568 (96.1)                                               | <0.01 |
|                                                                                                                                                                                                                                                                                        | <b>Prior Claim (Yes), No (%)</b>                               | 620 (10.8)                            | 86 (14.2)                                                | 0.012 |
|                                                                                                                                                                                                                                                                                        | <b>Economic Loss Claim (No), No (%)</b>                        | 3101 (54.1)                           | 329 (54.2)                                               | 0.96  |
|                                                                                                                                                                                                                                                                                        | <b>Weekly Earnings, Mean (SD)</b>                              | 1212.4<br>(2832.6)                    | 1001.4 (659.4)                                           | 0.23  |
|                                                                                                                                                                                                                                                                                        | <b>Legal Representation, (Yes), No (%)</b>                     | 1085 (18.9)                           | 370 (61.0)                                               | <0.01 |
|                                                                                                                                                                                                                                                                                        | <b>Accident Notification (Days), Mean (SD)</b>                 | 22.6 (22.9)                           | 23.9 (21.4)                                              | 0.32  |
|                                                                                                                                                                                                                                                                                        | <b>Notification of Claim (Days), Mean (SD)</b>                 | 112.7 (86.7)                          | 97.5 (69.1)                                              | <0.01 |
|                                                                                                                                                                                                                                                                                        | <b>Rehabilitation Indicator, No (%)</b>                        |                                       |                                                          | <0.01 |
|                                                                                                                                                                                                                                                                                        | Required                                                       | 398 (6.9)                             | 127 (20.9)                                               |       |
|                                                                                                                                                                                                                                                                                        | Possibly Required                                              | 2920 (50.9)                           | 287 (47.3)                                               |       |
|                                                                                                                                                                                                                                                                                        | Not Required                                                   | 1844 (32.2)                           | 171 (28.2)                                               |       |
|                                                                                                                                                                                                                                                                                        | <b>Role</b>                                                    |                                       |                                                          | <0.01 |
|                                                                                                                                                                                                                                                                                        | Driver                                                         | 3764 (65.6)                           | 386 (63.6)                                               |       |
|                                                                                                                                                                                                                                                                                        | Passenger                                                      | 1120 (19.5)                           | 156 (25.7)                                               |       |

|                        |             |            |       |
|------------------------|-------------|------------|-------|
| Rider                  | 404 (7.0)   | 23 (3.8)   |       |
| Pillion                | 22 (0.4)    | 2 (0.3)    |       |
| Pedestrian             | 237 (4.1)   | 30 (4.9)   |       |
| Cyclist                | 159 (2.8)   | 7 (1.2)    |       |
| Other                  | 28 (0.5)    | 3 (0.5)    |       |
| <b>Ambulance (yes)</b> | 2179 (38.0) | 300 (49.4) | <0.01 |
| <b>Hospital (yes)</b>  | 1405 (24.5) | 173 (28.5) | <0.01 |

**Note.** For some variables there were missing values; total number will therefore not always equal 6,341.

\* At fault claims are minor claims that are capped at payment of A\$5,000.00.

Table 2 shows a breakdown of musculoskeletal injury types for the sample separated by musculoskeletal injury only compared to musculoskeletal injury + psychological distress. Whilst it is accepted that an MVC survivor is vulnerable to sustaining several different categories of injuries (for example, whiplash and lumbar and other soft tissue injuries), Table 2 shows the most common musculoskeletal injury was soft tissue, followed by whiplash injuries.

Table 2 Breakdown of musculoskeletal injury types by musculoskeletal injury versus musculoskeletal injury with psychological distress from 2011- 2013.

| Musculoskeletal Injury Type | Musculoskeletal Injury Only (%)<br>n=5,734 (90.43%) | Musculoskeletal Injury + Psychological Distress (%)<br>n=607 (9.57%) | Total |
|-----------------------------|-----------------------------------------------------|----------------------------------------------------------------------|-------|
| Soft Tissue                 | 4630 (89.78)                                        | 527 (10.21)                                                          | 5157  |
| Whiplash                    | 3750 (89.43)                                        | 443 (10.56)                                                          | 4193  |
| Skin                        | 2133 (86.81)                                        | 324 (13.18)                                                          | 2457  |
| Lumbar                      | 1256 (84.69)                                        | 227 (15.30)                                                          | 1483  |
| Chest                       | 985 (86.10)                                         | 159 (13.89)                                                          | 1144  |
| Seatbelt                    | 672 (84.31)                                         | 125 (15.68)                                                          | 797   |
| Thoracic                    | 634 (86.84)                                         | 96 (13.15)                                                           | 730   |
| Upper Limb Joint            | 441 (87.67)                                         | 62 (12.32)                                                           | 503   |
| Upper Limb Fracture         | 432 (93.50)                                         | 30 (6.49)                                                            | 462   |
| Lower Limb Fracture         | 413 (93.43)                                         | 29 (6.56)                                                            | 442   |
| Lower Limb Joint            | 229 (87.40)                                         | 33 (12.59)                                                           | 262   |
| Face                        | 82 (85.41)                                          | 14 (14.58)                                                           | 96    |
| Abdomen                     | 49 (90.74)                                          | 5 (9.25)                                                             | 54    |
| Spinal Contusion            | 2 (100.00)                                          | 0 (0.00)                                                             | 2     |
| Finger Amputation           | 2 (100.00)                                          | 0 (0.00)                                                             | 2     |

Note. Percentages in columns are row percentages showing the percentage of the total for each musculoskeletal injury type in the musculoskeletal distress only versus musculoskeletal + psychological distress categories.

### **Claim settlement times, costs and legal representation**

ANOVA results confirmed a significant difference between musculoskeletal injury and musculoskeletal injury + psychological distress claim settlement times ( $F=392.82$ ,  $df=1$ , 6339,  $P<.001$ ). Mean days to claim settlement from accident date was significantly longer for musculoskeletal injury + psychological distress compared to musculoskeletal injury only (353.81 days;  $SD=164.83$ ; 95% CI 340.67-366.95 versus 231.65 days;  $SD=142.08$ ; 95% CI 227.97-235.32 respectively). This difference was significantly longer for musculoskeletal injury + psychological distress claimants (mean difference 122.16 days or 17.45 weeks).

ANOVA results also confirmed a significant difference in claim costs between musculoskeletal injury and musculoskeletal injury+ psychological distress claimants ( $F=444.03$ ,  $df=1$ , 6339,  $P<.001$ ). Mean claim costs for musculoskeletal injury only claimants was \$12,421.13;  $SD=37,071.78$ ; 95% CI 11,461.39-13,380.87. Mean claim costs for musculoskeletal injury + psychological distress claimants was A\$53,996.52;  $SD=96,693.42$ ; 95%CI 46,288.92-61,704.11. This is an overall mean increase of A\$41,575.39 or 4.3 times more expensive per case. To understand better the effect of injury severity on claim costs, a further ANOVA was conducted with serious and above musculoskeletal injury removed. This did not change the findings. Mean cost for musculoskeletal injury was A\$10,034.54 ( $SD=28,378.90$ ; 95%CI 9,267.37-10,801.71). Mean cost of musculoskeletal injury + psychological distress was A\$43,262.87 ( $SD=61,927.97$ ; 95% CI 38,023.02-48,502.71, and this was significantly greater for the musculoskeletal injury + psychological distress group ( $F=516.71$ ,  $df=1$ , 6,607,  $P=.000$ ). Musculoskeletal injury + psychological distress claimants were also significantly more likely ( $P<.01$ ) to involve legal representation (61.0% compared to 18.9%).

## **Impact of socio-demographic and injury characteristics on probability of psychological distress**

Table 1 presents the factors at the time of the MVC and claim lodgement that either increase or decrease the probabilities of musculoskeletal injury claimants being diagnosed with psychological distress. Age, economic loss (defined as yes/no) associated with the injury and claim, weekly earnings and hospitalisation did not significantly increase the probability of psychological distress. Socioeconomic disadvantage increased the probability of experiencing psychological distress (Mean musculoskeletal injury 1,017.9, SD=86.4; Mean musculoskeletal injury + psychological distress 986.5, SD=89.2,  $P<.01$ ). For example, over 40% of those with psychological distress were socially disadvantaged compared to 31% of those without psychological distress. There was a significant difference ( $P<.01$ ) between male and female claimants in terms of probability of also having psychological distress, that is, 65.1% were female who had a musculoskeletal injury + psychological distress compared to 57.8% with only musculoskeletal injury. Claimants who were unemployed were more likely to have psychological distress ( $P<.01$ ) compared to those employed. 4,197 (73.2%) of those working at the time of lodging their claim did not have psychological distress compared to 364 (60.0%) of those with musculoskeletal injury + psychological distress. 620 (10.8%) of those with a history of a prior claim did not have psychological distress, whereas 86 (14.2%) did have psychological distress suggesting those with a claim history are more likely to have psychological distress in addition to their musculoskeletal injury ( $P=.01$ ). Those with a musculoskeletal injury + psychological distress were more likely to have a serious injury severity score ( $P=.02$ ). Those with a musculoskeletal injury + psychological distress were also more likely to be not at fault (96.1% compared to 87.9% for musculoskeletal injury only). It is noted here, however, that data taken from an 'at fault' scheme necessarily means

1  
2  
3 there are limited at-fault claimants reducing confidence in its association with psychological  
4  
5 distress. No significant difference was found between the two groups in terms of number of  
6  
7 days taken for notifying the insurer of the MVC (either via a minor claim, that is, Accident  
8  
9 Notification Form, or a full claim). However in terms of days taken to notify the insurer of  
10  
11 the claim lodgement, those who had psychological distress were more likely to notify  
12  
13 lodgement of their claim sooner ( $P<.01$ ). It was also more likely that the claimant will require  
14  
15 rehabilitation if they have psychological distress ( $P<.01$ ). A larger portion of passengers had  
16  
17 psychological distress, whereas motorbike riders and cyclists were less likely to have  
18  
19 psychological distress ( $P<.01$ ). If an ambulance was required at the time of the MVC, the  
20  
21 claimant was significantly more likely to have psychological distress in addition to their  
22  
23 musculoskeletal injury ( $P<.01$ ), and similarly, if the claimant attended hospital they were  
24  
25 more likely to have psychological distress ( $P<.01$ ) than if hospitalisation was not required.  
26  
27  
28  
29  
30  
31

### 32 **Logistic regression analysis of significant socio-demographic and injury characteristics**

33  
34 All socio-demographic and injury characteristics that were found to significantly differentiate  
35  
36 between the two groups were entered into a logistic regression to determine their unadjusted  
37  
38 and adjusted predictive power of psychological distress. Table 3 shows that six variables  
39  
40 were associated with the presence of psychological distress. Being unemployed, being  
41  
42 female, being socio-economically disadvantaged, not being at fault, requiring an ambulance  
43  
44 at the time of their MVC and needing rehabilitation, were all found to be significant  
45  
46 contributors to an increased risk of having psychological distress. The area under the ROC  
47  
48 curve for this group of six variables was 70%. Adding non-significant variables to the logistic  
49  
50 regression did not significantly add to this percentage, providing validity for the predictive  
51  
52 capacity of the model.  
53  
54  
55  
56  
57  
58  
59  
60

Table 3 Logistic regression results showing predictors for claimants who experience psychological distress.

| Variable                                            | Unadjusted OR<br>(95% CI) | P      | Adjusted OR<br>(95% CI) | P      |
|-----------------------------------------------------|---------------------------|--------|-------------------------|--------|
| <b>Age</b>                                          | 1.01 (1.00, 1.01)         | 0.02   |                         |        |
| <b>New Injury Severity Score</b>                    |                           | 0.03   |                         |        |
| Minor- moderate 1-8                                 | 1.00                      |        |                         |        |
| Serious9-15                                         | 1.51 (1.12, 2.04)         | 0.007  |                         |        |
| Severe– critical 16-75                              | 1.20 (0.68, 2.10)         | 0.53   |                         |        |
| <b>Index of Relative Socioeconomic Disadvantage</b> |                           | <0.001 |                         | <0.001 |
| Most disadvantaged                                  | 1.65 (1.28, 2.12)         | <0.001 | 1.55 (1.18, 20.6)       | 0.002  |
| Disadvantaged                                       | 0.83 (0.61, 1.13)         | 0.24   | 0.87 (0.62, 1.23)       | 0.43   |
| Average                                             | 1.00                      |        | 1.00                    |        |
| Advantaged                                          | 0.99 (0.74, 1.32)         | 0.96   | 1.07 (0.77, 1.48)       | 0.70   |
| Most advantaged                                     | 0.61 (0.47, 0.79)         | <0.001 | 0.60 (0.45, 0.81)       | 0.001  |
| <b>Male</b>                                         | 0.73 (0.62, 0.87)         | <0.001 | 0.72 (0.59, 0.88)       | 0.001  |
| <b>Employment Status (Yes)</b>                      | 0.55 (0.46, 0.65)         | <0.001 | 0.71 (0.58, 0.87)       | 0.001  |
| <b>At Fault (Yes)</b>                               | 0.29 (0.19, 0.45)         | <0.001 | 0.25 (0.15, 0.40)       | <0.001 |
| <b>Prior Claim (Yes)</b>                            | 1.36 (1.07, 1.73)         | 0.013  |                         |        |
| <b>Rehabilitation Indicator</b>                     |                           | <0.001 |                         | <0.001 |
| Required                                            | 1.00                      |        | 1.00                    |        |
| Possibly Required                                   | 0.31 (0.24, 0.39)         | <0.001 | 0.37 (0.29), 0.48)      | <0.001 |
| Not Required                                        | 0.29 (0.23, 0.38)         | <0.001 | 0.36 (0.27, 0.48)       | <0.001 |
| Other                                               | 0.12 (0.08, 0.19)         | <0.001 | 0.17 (0.08, 0.38)       | <0.001 |
| <b>Role</b>                                         |                           | <0.001 |                         |        |
| Driver                                              | 1.00                      |        |                         |        |
| Passenger                                           | 1.36 (1.12, 1.66)         | 0.002  |                         |        |
| Rider                                               | 0.56 (0.36, 0.86)         | 0.008  |                         |        |
| Pillion                                             | 0.89 (0.21, 3.78)         | 0.87   |                         |        |
| Pedestrian                                          | 1.23 (0.83, 1.83)         | 0.30   |                         |        |
| Cyclist                                             | 0.43 (0.32, 3.45)         | 0.03   |                         |        |
| Other                                               | 1.05 (0.32, 3.45)         | 0.94   |                         |        |
| <b>Transportation by Ambulance (yes)</b>            | 1.47 (1.22, 1.77)         | <0.001 | 1.44 (1.19, 1.76)       | <0.001 |
| <b>Hospital (yes)</b>                               | 1.14 (0.94, 1.38)         | 0.19   |                         |        |
|                                                     | ROC=                      | 0.70   |                         |        |

Note. Adjusted odds ratios (OR), 95% confidence intervals (95% CI). P-values are shown.

### Sensitivity analysis

Sensitivity analysis was conducted with a subset of those that had post-traumatic stress disorder (PTSD) only. In this subset those with other types of psychological distress were excluded from the analysis. For those with PTSD diagnosis only (n=83), SEIFA, fault and rehabilitation indicators were significant predictors. Although employment and sex were no

1  
2  
3 longer significant in this model, the effect sizes for all predictors were greater in this PTSD  
4 only subset, indicating that no-significance is likely a result of reduced power in the sample.  
5  
6  
7 The overall performance of the model was greater in the PTSD only subset with a  
8  
9  
10 concordance index of 0.764 compared to 0.695 in the original model.  
11

## 12 13 14 **DISCUSSION**

15  
16 In NSW, Australia an MVC fault based system is legislated which provides compensation for  
17  
18 people injured in MVCs that were the fault of another vehicle owner or driver. The driver at  
19  
20 fault is the person who was driving the vehicle considered most at fault in the accident.<sup>35</sup>  
21  
22 Analysis of the PIR data of all NSW compensation claimants over 27 months between 2011  
23  
24 and 2013 who met the inclusion criteria revealed that almost 10% of claimants will be  
25  
26 diagnosed with elevated psychological distress such as depression or PTSD, or a distressing  
27  
28 condition involving significantly elevated anxiety and depressive mood. For comparison, the  
29  
30 Australian prevalence of elevated psychological distress such as PTSD is estimated at  
31  
32 0.9±0.1% and depression is estimated at 3.5±0.2%.<sup>41</sup> The prevalence of musculoskeletal  
33  
34 injury with a comorbid depression has been estimated at 29.51±3.21.<sup>42</sup> Furthermore, prior  
35  
36 research has consistently found levels of psychologically distressing symptomatology to  
37  
38 range between 20-40% for people sustaining injury in an MVC, irrespective of whether they  
39  
40 have made a compensation claim.<sup>3</sup> The current findings reported in this paper suggest a much  
41  
42 lower percentage of psychological symptomatology. Nevertheless, the psychological data  
43  
44 presented in this paper are reporting disorders rather than symptomatology. Distress  
45  
46 associated with the claims process has been documented,<sup>3</sup> and the significant escalations in  
47  
48 time to claim settlement and cost increases revealed in this study warrant action for their  
49  
50 amelioration. Prevalence differences found in prior studies may well be a factor of employing  
51  
52 prospective research designs and research- based diagnostic assessments. However, the  
53  
54  
55  
56  
57  
58  
59  
60

1  
2  
3 current findings have considerable consequences given they are based on outcomes from  
4 every MVC casualty in NSW over a 27 month period with a defined injury (musculoskeletal)  
5 and who settled their claim. Furthermore, the diagnosis of psychological distress was based  
6 on international mental health criteria (ICD-10-AM) and sourced from treating clinicians and  
7 independent medical/psychological assessments.  
8  
9  
10  
11  
12

13  
14 The findings also confirmed that the presence of psychological distress is associated  
15 with substantially increased claim settlement times, a mean increase of the total cost of the  
16 claim by over A\$40,000. Legal representation was also significantly more likely in those with  
17 psychological distress. These findings provide compelling evidence, confirming that the  
18 presence of psychological distress during the claims process (regardless of whether it was  
19 pre-morbid or not), results in potentially adverse outcomes for the wellbeing of affected  
20 individuals and for insurance and regulatory organisations with increased settlement times  
21 and costs.  
22  
23  
24  
25  
26  
27  
28  
29  
30

31  
32 The identification of the factors that are likely to elevate risk of psychological distress  
33 during the claims process for injury compensation following an MVC provide healthcare  
34 professionals and insurance companies/regulatory bodies some scope for ameliorating the  
35 risk of escalating claim settlement times and costs. The current study provided evidence for  
36 six independent predictors of psychological distress during the claim process. It is not  
37 surprising that unemployment, social disadvantage and a history of prior claims are risk  
38 factors for increased psychological distress given they are somewhat related factors, and that  
39 prior research has indicated their contribution to poorer mental health status.<sup>43 44</sup> It is  
40 acknowledged that prior mental health problems can predispose people to elevated  
41 psychological distress after their MVC,<sup>3 9</sup> however there is no avenue available for assessing  
42 the impact of this influence given such a predisposing factor is not routinely collected by  
43 insurance companies. Nevertheless, strategies and resources will need to consider this risk  
44  
45  
46  
47  
48  
49  
50  
51  
52  
53  
54  
55  
56  
57  
58  
59  
60



1  
2  
3 factor. Similarly, it is not surprising that being female is a risk factor for distress during the  
4  
5 claims process given higher prevalence rates of psychological distress for females are  
6  
7 consistently reported across general populations.<sup>44</sup> This would suggest resources directed at  
8  
9 females to prevent escalation of distress in the claims process appears warranted.  
10  
11 Transportation by an ambulance at the time of their accident is perhaps related to severity of  
12  
13 the injury, and future research will be needed to clarify this risk factor. Requiring  
14  
15 rehabilitation was also found to be a significant predictor of psychological distress perhaps  
16  
17 suggesting that some claimants who become psychologically distressed may be receiving  
18  
19 rehabilitation regardless of their physical injury severity. This suggests that early intervention  
20  
21 for psychological distress may well reduce the need for extended rehabilitation. Similarly,  
22  
23 resources directed at those who are not at fault of the MVC may help reduce the risk of  
24  
25 psychological distress negatively impacting on the claim's expected settlement times and cost  
26  
27 trajectories. For example, related to at fault status, previous research has found a relationship  
28  
29 between perceived injustice and the high prevalence of occupational disability in whiplash  
30  
31 injuries.<sup>45</sup> Changing to a no fault scheme may reduce the association between fault status and  
32  
33 increased claim settlement times and costs.  
34  
35  
36  
37

38  
39 Limitations of this study need to be discussed. It was not possible to determine pre-  
40  
41 injury presence of psychological distress. It is expected that the presence of pre-injury  
42  
43 psychological distress would have a considerable impact on the presence of psychological  
44  
45 distress during the claims process. However, arguably, proxy measures of pre-injury  
46  
47 psychological distress existed in the study, namely social disadvantage and unemployment,  
48  
49 both highly related to the presence of psychological disorder.<sup>43</sup> These two measures were  
50  
51 found to predict psychological distress during the claim process. Nevertheless, research with  
52  
53 access to pre-injury health data shows that diagnosed psychological/psychiatric illness prior  
54  
55 to injury is a significant risk factor for psychological distress following an MVC incident.<sup>46</sup>  
56  
57  
58  
59  
60

1  
2  
3 Due to the data being collected in a fault based CTP scheme, very few claimants were at  
4 fault, and this may have been a factor in its predictor status of psychological distress. Clearly,  
5 the predictive capacity of fault status requires further research. The inclusion of only settled  
6 claims has the potential to exclude more claims in which psychological distress played a role  
7 given their propensity to be more lengthy for the claimant. It was also not possible to know  
8 with a high level of accuracy what psychological condition was experienced.  
9  
10  
11  
12  
13  
14  
15

16 This retrospective cohort study has positive implications at several systemic levels.  
17 First, the results reported in this paper can assist general practitioners provide improved  
18 healthcare support to their clients knowing that those presenting with psychological distress  
19 in addition to their musculoskeletal injury may require additional support such as referral to a  
20 clinical psychologist or psychiatrist early in the claims process to reduce the risk of the claim  
21 becoming more complex and subsequently more lengthy and expensive. Second, assuming  
22 the goal of insurance companies is to support a claimant through the process of compensation  
23 with effective injury management and timely return to work, the results presented suggest  
24 there are known targets for change (psychological distress), and that specific predictors  
25 available in insurers' personal injury databases can effectively identify who is likely to  
26 benefit from specific distress management strategies. This suggests changes to healthcare  
27 protocols and practices are warranted. For example, in accordance with previous research,  
28 directing additional resources such as screening and treating psychological conditions of  
29 claimants who are at higher risk<sup>9</sup> regardless of whether their psychological condition pre-  
30 dated their MVC provides opportunity for reducing time and costs involved with  
31 compensation claims.  
32  
33  
34  
35  
36  
37  
38  
39  
40  
41  
42  
43  
44  
45  
46  
47  
48  
49  
50  
51  
52  
53  
54  
55  
56  
57  
58  
59  
60

1  
2  
3 **Funding** This research was funded by a competitive grant from the State Insurance  
4  
5 Regulatory Authority (formerly the Motor Accident Authority NSW); MAA ref: 14/366. The  
6  
7 views expressed in this paper are those of the authors only and not those of SIRA's.  
8  
9

10  
11 **Contributors** RG, YT and AC contributed to the study conception and design, analysis and  
12  
13 interpretation of data, drafting of the manuscript and revision based on the comments of the  
14  
15 co-authors. BG and IC contributed to the study design and revision based on comments of  
16  
17 reviewers. All authors approved the submitted manuscript for publication.  
18  
19

20  
21  
22  
23 **Declaration of Interest** None.  
24  
25

26  
27 **Data Sharing Statement** No additional data available.  
28  
29

30  
31  
32 **Acknowledgement** The authors acknowledge and thank the NSW MVC survivors whose  
33  
34 data have been analysed and reported in this publication.  
35  
36  
37  
38  
39  
40  
41  
42  
43  
44  
45  
46  
47  
48  
49  
50  
51  
52  
53  
54  
55  
56  
57  
58  
59  
60

## REFERENCES

1. Department of Transport. Reported road casualties in Great Britain: main results in 2014 2015. Available from: [www.gov.uk/government/uploads/system/uploads/attachment\\_data/file/438040/reported-road-casualties-in-great-britain-main-results-2014-release.pdf](http://www.gov.uk/government/uploads/system/uploads/attachment_data/file/438040/reported-road-casualties-in-great-britain-main-results-2014-release.pdf).
2. Bureau of Infrastructure, Transport, and Regional Economics (BITRE). Road trauma Australia, 2015 statistical summary BITRE, Canberra ACT. 2016.
3. Craig A, Tran, Y., Guest, R., Gopinath, B., Jagnoor, J., Bryant, R. A., Collie, A., Tate, R., Kenardy, J., Middleton, J., Cameron, I. D. The psychological impact of injuries sustained in motor vehicle crashes: Systematic review and meta-analysis. *BMJ Open*. 2016;In press.
4. Guest R, Tran Y, Gopinath B, Cameron ID, Craig A. Prevention of the development of psychological distress following a motor vehicle crash: study protocol for a randomized controlled trial. *Trials*. 2016;17(1):317.
5. Nantulya VM, Reich MR. The neglected epidemic: road traffic injuries in developing countries. *BMJ: Brit Med J*. 2002;324(7346):1139.
6. Peden M. World report on road traffic injury prevention. World Health Organization Geneva; 2004.
7. Heron-Delaney M, Kenardy J, Charlton E, Matsuoka Y. A systematic review of predictors of posttraumatic stress disorder (PTSD) for adult road traffic crash survivors. *Injury*. 2013;44(11):1413-22.
8. Holbrook TL, Anderson JP, Sieber WJ, Browner D, Hoyt DB. Outcome after major trauma: 12-month and 18-month follow-up results from the Trauma Recovery Project. *Journal of Trauma and Acute Care Surgery*. 1999;46(5):765-73.
9. Papadakaki M, Ferraro OE, Orsi C, Otte D, Tzamalouka G, Von-der-Geest M, et al. Psychological distress and physical disability in patients sustaining severe injuries in road traffic crashes: Results from a one-year cohort study from three European countries. *Injury*. 2017;48(2):297-306.
10. Blanchard EB, Hickling EJ, Malta LS, Freidenberg BM, Canna MA, Kuhn E, et al. One- and two-year prospective follow-up of cognitive behavior therapy or supportive psychotherapy. *Behav Res Ther*. 2004;42(7):745-59.
11. Grant GM, O'Donnell ML, Spittal MJ, Creamer M, Studdert DM. Relationship between stressfulness of claiming for injury compensation and long-term recovery: a prospective cohort study. *JAMA psychiatry*. 2014;71(4):446-53.
12. Elbers NA, Hulst L, Cuijpers P, Akkermans AJ, Bruinvels DJ. Do compensation processes impair mental health? A meta-analysis. *Injury*. 2013;44(5):674-83.
13. Harris IA, Young JM, Jalaludin BB, Solomon MJ. The effect of compensation on general health in patients sustaining fractures in motor vehicle trauma. *J Orthop Trauma*. 2008;22(4):216-20.
14. Gabbe BJ, Cameron PA, Williamson OD, Edwards ER, Graves SE, Richardson MD. The relationship between compensable status and long-term patient outcomes following orthopaedic trauma. *Med J Aust*. 2007;187(1):14.
15. O'Donnell ML, Creamer MC, McFarlane AC, Silove D, Bryant RA. Does access to compensation have an impact on recovery outcomes after injury? *Med J Aust*. 2010;192(6):328-33.
16. Shuman DW. Psychology of Compensation in Tort Law, *The. U Kan L Rev*. 1994;43:39.
17. Murgatroyd D, Lockwood K, Garth B, Cameron ID. The perceptions and experiences of people injured in motor vehicle crashes in a compensation scheme setting: a qualitative study. *BMC Public Health*. 2015;15(1):423.

- 1
  - 2
  - 3
  - 4
  - 5
  - 6
  - 7
  - 8
  - 9
  - 10
  - 11
  - 12
  - 13
  - 14
  - 15
  - 16
  - 17
  - 18
  - 19
  - 20
  - 21
  - 22
  - 23
  - 24
  - 25
  - 26
  - 27
  - 28
  - 29
  - 30
  - 31
  - 32
  - 33
  - 34
  - 35
  - 36
  - 37
  - 38
  - 39
  - 40
  - 41
  - 42
  - 43
  - 44
  - 45
  - 46
  - 47
  - 48
  - 49
  - 50
  - 51
  - 52
  - 53
  - 54
  - 55
  - 56
  - 57
  - 58
  - 59
  - 60
18. Air TM, McFarlane AC, Psychother D. Posttraumatic stress disorder and its impact on the economic and health costs of motor vehicle accidents in South Australia. *J Clin Psychiatry*. 2003;64(2):175-81.
19. Gabbe BJ, Simpson PM, Cameron PA, Ekegren CL, Edwards ER, Page R, et al. Association between perception of fault for the crash and function, return to work and health status 1 year after road traffic injury: a registry-based cohort study. *BMJ open*. 2015;5(11):e009907.
20. Cassidy JD, Carroll LJ, Cote P, Lemstra M, Berglund A, Nygren A. Effect of eliminating compensation for pain and suffering on the outcome of insurance claims for whiplash injury. *N Engl J Med*. 2000;342(16):1179-86.
21. Organization WH. Global health risks: mortality and burden of disease attributable to selected major risks: World Health Organization; 2009.
22. Murray CJL, Abraham J, Ali MK, Alvarado M, Atkinson C, Baddour LM, et al. The State of US health, 1990-2010: Burden of diseases, injuries, and risk factors. *JAMA - Journal of the American Medical Association*. 2013;310(6):591-608.
23. Littleton S, Cameron ID, Poustie S, Hughes D, Robinson B, Neeman T, et al. The association of compensation on longer term health status for people with musculoskeletal injuries following road traffic crashes: emergency department inception cohort study. *Injury*. 2011;42(9):927-33.
24. Giannoudis PV, Mehta SS, Tsiridis E. Incidence and outcome of whiplash injury after multiple trauma. *Spine (Phila Pa 1976)*. 2007;32(7):776-81.
25. Littleton SM, Cameron ID, Poustie SJ, Hughes DC, Robinson BJ, Neeman T, et al. The association of compensation on longer term health status for people with musculoskeletal injuries following road traffic crashes: Emergency department inception cohort study. *Injury-International Journal of the Care of the Injured*. 2011;42(9):927-33.
26. Hendriks EJ, Scholten-Peeters GG, van der Windt DA, Neeleman-van der Steen CW, Oostendorp RA, Verhagen AP. Prognostic factors for poor recovery in acute whiplash patients. *Pain*. 2005;114(3):408-16.
27. Sterling M, Kenardy J. Physical and psychological aspects of whiplash: Important considerations for primary care assessment. *Man Ther*. 2008;13(2):93-102.
28. Berglund A, Bodin L, Jensen I, Wiklund A, Alfredsson L. The influence of prognostic factors on neck pain intensity, disability, anxiety and depression over a 2-year period in subjects with acute whiplash injury. *Pain*. 2006;125(3):244-56.
29. Carroll LJ, Cassidy JD, Cote P. The role of pain coping strategies in prognosis after whiplash injury: Passive coping predicts slowed recovery. *Pain*. 2006;124(1-2):18-26.
30. Sterling M, Kenardy J, Jull G, Vicenzino B. The development of psychological changes following whiplash injury. *Pain*. 2003;106(3):481-9.
31. Radanov BP, Begré S, Sturzenegger M, Augustiny KF. Course of psychological variables in whiplash injury—a 2-year follow-up with age, gender and education pair-matched patients. *Pain*. 1996;64(3):429-34.
32. Ameratunga SN, Norton RN, Bennett DA, Jackson RT. Risk of disability due to car crashes: A review of the literature and methodological issues. *Injury*. 2004;35(11):1116-27.
33. Australian Consortium for Classification Development. 1998. Available from: [https://www.google.com.au/?gws\\_rd=ssl#safe=off&q=www.accd.net.au%2Ffid10.aspx](https://www.google.com.au/?gws_rd=ssl#safe=off&q=www.accd.net.au%2Ffid10.aspx).
34. State Insurance Regulatory Authority. Fees, Costs and Charges; 2015. Available from: <http://www.sira.nsw.gov.au/motor-accidents/for-professionals/fees-costs-and-charges>.
35. Cutter A. Comparison across CTP schemes. Australasia: Institute of Actuaries of Australia; 2007.
36. Stevenson M, Segui-Gomez M, Lescohier I, Di Scala C, McDonald-Smith G. An overview of the injury severity score and the new injury severity score. *Injury Prev*. 2001;7(1):10-3.
37. Pink B. Information paper: an introduction to socio-economic indexes for areas (SEIFA), 2006. Canberra: Australian Bureau of Statistics (ABS). 2008.

- 1  
2  
3 38. Organization WH. The ICD-10 classification of mental and behavioural disorders: clinical  
4 descriptions and diagnostic guidelines: Geneva: World Health Organization; 1992.  
5 39. Hosmer Jr DW, Lemeshow S. Applied logistic regression: John Wiley & Sons; 2004.  
6 40. Large MM. Relationship between compensation claims for psychiatric injury and severity of  
7 physical injuries from motor vehicle accidents. *Med J Aust.* 2001;175(3):129-33.  
8 41. Andrews G, Henderson S, Hall W. Prevalence, comorbidity, disability and service utilisation.  
9 *Br J Psychiatry.* 2001;178(2):145-53.  
10 42. Lloyd C, Waghorn G, McHugh C. Musculoskeletal disorders and comorbid depression:  
11 implications for practice. *Aust Occup Ther J.* 2008;55(1):23-9.  
12 43. Mezuk B, Rafferty JA, Kershaw KN, Hudson D, Abdou CM, Lee H, et al. Reconsidering the role  
13 of social disadvantage in physical and mental health: stressful life events, health behaviors,  
14 race, and depression. *Am J Epidemiol.* 2010;172(11):1238-49.  
15 44. Wilhelm K, Mitchell P, Slade T, Brownhill S, Andrews G. Prevalence and correlates of DSM-IV  
16 major depression in an Australian national survey. *J Affect Disord.* 2003;75(2):155-62.  
17 45. Sullivan MJ, Davidson N, Garfinkel B, Siriapaipant N, Scott W. Perceived injustice is  
18 associated with heightened pain behavior and disability in individuals with whiplash injuries.  
19 *Psychol Inj Law.* 2009;2(3-4):238-47.  
20 46. Ehlers A, Mayou RA, Bryant B. Psychological predictors of chronic posttraumatic stress  
21 disorder after motor vehicle accidents. *J Abnorm Psychol.* 1998;107(3):508.  
22  
23  
24  
25  
26  
27  
28  
29  
30  
31  
32  
33  
34  
35  
36  
37  
38  
39  
40  
41  
42  
43  
44  
45  
46  
47  
48  
49  
50  
51  
52  
53  
54  
55  
56  
57  
58  
59  
60

STROBE Statement—Checklist of items that should be included in reports of *cohort studies*

|                              | Item No | Recommendation                                                                                                                                                                                                                                                                                                                                                                 |
|------------------------------|---------|--------------------------------------------------------------------------------------------------------------------------------------------------------------------------------------------------------------------------------------------------------------------------------------------------------------------------------------------------------------------------------|
| <b>Title and abstract</b>    | 1       | (a) Indicate the study's design with a commonly used term in the title or the abstract<br>Page 1-2<br>(b) Provide in the abstract an informative and balanced summary of what was done and what was found<br>Page 2                                                                                                                                                            |
| <b>Introduction</b>          |         |                                                                                                                                                                                                                                                                                                                                                                                |
| Background/rationale         | 2       | Explain the scientific background and rationale for the investigation being reported<br>Pages 5-7                                                                                                                                                                                                                                                                              |
| Objectives                   | 3       | State specific objectives, including any prespecified hypotheses<br>Page 7                                                                                                                                                                                                                                                                                                     |
| <b>Methods</b>               |         |                                                                                                                                                                                                                                                                                                                                                                                |
| Study design                 | 4       | Present key elements of study design early in the paper<br>Page 8                                                                                                                                                                                                                                                                                                              |
| Setting                      | 5       | Describe the setting, locations, and relevant dates, including periods of recruitment, exposure, follow-up, and data collection<br>Pages 7-9                                                                                                                                                                                                                                   |
| Participants                 | 6       | (a) Give the eligibility criteria, and the sources and methods of selection of participants. Describe methods of follow-up<br>Pages 7-8<br>(b) For matched studies, give matching criteria and number of exposed and unexposed<br>N/A                                                                                                                                          |
| Variables                    | 7       | Clearly define all outcomes, exposures, predictors, potential confounders, and effect modifiers. Give diagnostic criteria, if applicable<br>Pages 8-9                                                                                                                                                                                                                          |
| Data sources/<br>measurement | 8*      | For each variable of interest, give sources of data and details of methods of assessment (measurement). Describe comparability of assessment methods if there is more than one group<br>Pages 8-9                                                                                                                                                                              |
| Bias                         | 9       | Describe any efforts to address potential sources of bias<br>19                                                                                                                                                                                                                                                                                                                |
| Study size                   | 10      | Explain how the study size was arrived at<br>Page 9                                                                                                                                                                                                                                                                                                                            |
| Quantitative variables       | 11      | Explain how quantitative variables were handled in the analyses. If applicable, describe which groupings were chosen and why<br>Page 8-9                                                                                                                                                                                                                                       |
| Statistical methods          | 12      | (a) Describe all statistical methods, including those used to control for confounding<br>Page 9-10<br>(b) Describe any methods used to examine subgroups and interactions<br>N/A<br>(c) Explain how missing data were addressed<br>Page 9-10<br>(d) If applicable, explain how loss to follow-up was addressed<br>N/A<br>(e) Describe any sensitivity analyses<br>Page 13 & 16 |

| <b>Results</b>           |     |                                                                                                                                                                                                                                                                                                                                                                                                                                           |
|--------------------------|-----|-------------------------------------------------------------------------------------------------------------------------------------------------------------------------------------------------------------------------------------------------------------------------------------------------------------------------------------------------------------------------------------------------------------------------------------------|
| Participants             | 13* | (a) Report numbers of individuals at each stage of study—eg numbers potentially eligible, examined for eligibility, confirmed eligible, included in the study, completing follow-up, and analysed<br>Page 7-8<br>(b) Give reasons for non-participation at each stage<br>Page 7-9<br>(c) Consider use of a flow diagram<br>N/A                                                                                                            |
| Descriptive data         | 14* | (a) Give characteristics of study participants (eg demographic, clinical, social) and information on exposures and potential confounders<br>Page 7-8 & 10-11<br>(b) Indicate number of participants with missing data for each variable of interest<br>N/A<br>(c) Summarise follow-up time (eg, average and total amount)<br>N/A                                                                                                          |
| Outcome data             | 15* | Report numbers of outcome events or summary measures over time<br>N/A                                                                                                                                                                                                                                                                                                                                                                     |
| Main results             | 16  | (a) Give unadjusted estimates and, if applicable, confounder-adjusted estimates and their precision (eg, 95% confidence interval). Make clear which confounders were adjusted for and why they were included<br>Page 15-16<br>(b) Report category boundaries when continuous variables were categorized<br>N/A<br>(c) If relevant, consider translating estimates of relative risk into absolute risk for a meaningful time period<br>N/A |
| Other analyses           | 17  | Report other analyses done—eg analyses of subgroups and interactions, and sensitivity analyses<br>N/A                                                                                                                                                                                                                                                                                                                                     |
| <b>Discussion</b>        |     |                                                                                                                                                                                                                                                                                                                                                                                                                                           |
| Key results              | 18  | Summarise key results with reference to study objectives<br>Pages 16-20                                                                                                                                                                                                                                                                                                                                                                   |
| Limitations              | 19  | Discuss limitations of the study, taking into account sources of potential bias or imprecision. Discuss both direction and magnitude of any potential bias<br>Page 19                                                                                                                                                                                                                                                                     |
| Interpretation           | 20  | Give a cautious overall interpretation of results considering objectives, limitations, multiplicity of analyses, results from similar studies, and other relevant evidence<br>Page 17-20                                                                                                                                                                                                                                                  |
| Generalisability         | 21  | Discuss the generalisability (external validity) of the study results<br>Page 19-20                                                                                                                                                                                                                                                                                                                                                       |
| <b>Other information</b> |     |                                                                                                                                                                                                                                                                                                                                                                                                                                           |
| Funding                  | 22  | Give the source of funding and the role of the funders for the present study and, if applicable, for the original study on which the present article is based<br>Page 21                                                                                                                                                                                                                                                                  |

\*Give information separately for exposed and unexposed groups.



1 **Note:** An Explanation and Elaboration article discusses each checklist item and gives methodological background and  
2 published examples of transparent reporting. The STROBE checklist is best used in conjunction with this article (freely  
3 available on the Web sites of PLoS Medicine at <http://www.plosmedicine.org/>, Annals of Internal Medicine at  
4 <http://www.annals.org/>, and Epidemiology at <http://www.epidem.com/>). Information on the STROBE Initiative is  
5 available at <http://www.strobe-statement.org>.  
6  
7  
8  
9  
10  
11  
12  
13  
14  
15  
16  
17  
18  
19  
20  
21  
22  
23  
24  
25  
26  
27  
28  
29  
30  
31  
32  
33  
34  
35  
36  
37  
38  
39  
40  
41  
42  
43  
44  
45  
46  
47  
48  
49  
50  
51  
52  
53  
54  
55  
56  
57  
58  
59  
60

For peer review only
